# Supplementary material for: Uncovering MicroRNA and Transcription Factor Mediated Regulatory Networks in Glioblastoma
Source: PLoS Comput Biol. 2012 Jul 19;8(7):e1002488. doi: 10.1371/journal.pcbi.1002488 (PMC3400583; doi:10.1371/journal.pcbi.1002488)
Supplement: Table S2 — Merged 3-node FFLs including TF-FFLs, miRNA-FFLs and composite-FFLs. (XLS) [file pcbi.1002488.s012.xls]

## Sheet: TF-FFLs
Merged 3-node FFLs:TF-FFLs
Feed-forward loop (FFL) ID	GBM-related genes
hsa-let-7e|ASCL1	EPHA4; INSR; LMX1A; NRAS; TNFRSF1B
hsa-let-7e|ETV4	CACNA1E; COL1A1
hsa-let-7e|GATA1	CACNA1E; EPHA4; NTRK3; RPS6KA3; STEAP3; TP53; TSC1
hsa-let-7e|MAFB	INSR; NRAS; TNFRSF1B; TP53
hsa-let-7e|MYF6	EPHA4; INSR; LMX1A; NRAS; TNFRSF1B
hsa-let-7e|MYOD1	EPHA4; INSR; LMX1A; NRAS; TNFRSF1B
hsa-let-7e|MYOG	EPHA4; INSR; LMX1A; NRAS; TNFRSF1B
hsa-let-7e|MZF1	CACNA1E; COL1A1; EPHA4; INSR; KIAA1467; LMX1A; MYCN; NTRK3; RPS6KA3; TP53; TSC1
hsa-let-7e|SMAD1	CACNA1E; COL1A1; MYCN; RB1; STEAP3; TSC1
hsa-let-7e|SMAD3	CACNA1E; RPS6KA3
hsa-let-7e|SOX10	CACNA1E; COL1A1; EPHA4; MYCN; NRAS; STEAP3; TP53; TSC1
hsa-let-7e|SPZ1	COL1A1
hsa-let-7e|SREBF1	CACNA1E; COL1A1; INSR; LMX1A; NTRK3; RPS6KA3; TNFRSF1B
hsa-let-7e|TCF12	EPHA4; INSR; LMX1A; NRAS; RPS6KA3; TNFRSF1B
hsa-let-7e|TCF3	EPHA4; INSR; LMX1A; NRAS; TNFRSF1B
hsa-let-7e|TCF4	EPHA4; INSR; LMX1A; NRAS; TNFRSF1B
hsa-let-7e|TFAP2A	RB1; RPS6KA3
hsa-let-7e|WT1	MYCN; NTRK3
hsa-let-7e|ZBTB7A	MYCN; NTRK3; RB1; STEAP3; TP53
hsa-let-7e|ZFP161	CACNA1E; EPHA4; MYCN; RPS6KA3
hsa-let-7i|ARNT	LMX1A
hsa-let-7i|ASCL1	EPHA4; INSR; LMX1A; NRAS; TNFRSF1B
hsa-let-7i|BHLHE40	INSR; NRAS
hsa-let-7i|BHLHE41	INSR; NRAS
hsa-let-7i|ELK1	CACNA1E; NRAS; RB1; RPS6KA3; STEAP3; TP53
hsa-let-7i|ETS1	CACNA1E; NRAS; RB1; RPS6KA3; STEAP3; TSC1
hsa-let-7i|ETV4	CACNA1E; COL1A1
hsa-let-7i|GATA1	CACNA1E; EPHA4; NTRK3; RPS6KA3; STEAP3; TP53; TSC1
hsa-let-7i|GATA2	CACNA1E; STEAP3; TP53
hsa-let-7i|HAND1	INSR; NRAS
hsa-let-7i|HAND2	INSR; NRAS
hsa-let-7i|MAX	INSR; LMX1A; NRAS; RPS6KA3; TNFRSF1B; TP53; TSC1
hsa-let-7i|MITF	INSR; NRAS
hsa-let-7i|MXD3	INSR; NRAS
hsa-let-7i|MYC	INSR; LMX1A; NRAS; RPS6KA3; TNFRSF1B; TP53; TSC1
hsa-let-7i|MYF6	EPHA4; INSR; LMX1A; NRAS; TNFRSF1B
hsa-let-7i|MYOD1	EPHA4; INSR; LMX1A; NRAS; TNFRSF1B
hsa-let-7i|MYOG	EPHA4; INSR; LMX1A; NRAS; TNFRSF1B
hsa-let-7i|NHLH1	INSR; NRAS
hsa-let-7i|SMAD1	CACNA1E; COL1A1; MYCN; RB1; STEAP3; TSC1
hsa-let-7i|SP1	CACNA1E; EPHA4; LMX1A; MYCN; NRAS; NTRK3; RPS6KA3; TNFRSF1B
hsa-let-7i|SP2	CACNA1E; EPHA4; LMX1A; MYCN; NRAS; NTRK3; RPS6KA3; TNFRSF1B
hsa-let-7i|SP3	CACNA1E; EPHA4; LMX1A; MYCN; NRAS; NTRK3; RPS6KA3; TNFRSF1B
hsa-let-7i|SP4	CACNA1E; EPHA4; LMX1A; MYCN; NRAS; NTRK3; RPS6KA3; TNFRSF1B
hsa-let-7i|SREBF2	CACNA1E; EPHA4; NTRK3; RB1; RPS6KA3; TNFRSF1B
hsa-let-7i|TCF12	EPHA4; INSR; LMX1A; NRAS; RPS6KA3; TNFRSF1B
hsa-let-7i|TCF3	EPHA4; INSR; LMX1A; NRAS; TNFRSF1B
hsa-let-7i|TCF4	EPHA4; INSR; LMX1A; NRAS; TNFRSF1B
hsa-let-7i|TEAD1	CACNA1E; LMX1A; MYCN; RB1; TNFRSF1B
hsa-let-7i|TFAP2A	RB1; RPS6KA3
hsa-let-7i|USF1	INSR; LMX1A; NRAS; TP53; TSC1
hsa-let-7i|USF2	INSR; LMX1A; NRAS; TP53; TSC1
hsa-let-7i|YY1	KIAA1467; NRAS; RPS6KA3; STEAP3; TSC1
hsa-let-7i|ZFP161	CACNA1E; EPHA4; MYCN; RPS6KA3
hsa-miR-106b|ELK1	CYLD; DLGAP2; RB1; RPS6KA3; STAT3; VAV2; WEE1
hsa-miR-106b|ETS1	RB1; RPS6KA3; VAV2; WEE1
hsa-miR-106b|GATA1	CSGALNACT1; EPHA4; EPHA7; ERBB3; MARK4; NTRK3; PDGFRA; RPS6KA3; SPTBN1
hsa-miR-106b|GATA2	CSGALNACT1; EPHA7; PDGFRA; SPTBN1
hsa-miR-106b|MAFB	CSGALNACT1; CYLD; ERBB3; PDGFRA; SPTBN1; TIMP2; WEE1
hsa-miR-106b|MZF1	EPHA4; MARK4; NTRK3; PDGFRA; PIK3R1; PTEN; RPS6KA3; STAT3; SV2B
hsa-miR-106b|NEUROD1	CSGALNACT1; DYNC1LI2; ERBB3; RB1; RPS6KA3; SPTBN1; STAT3; SV2B; TIMP2; VAV2
hsa-miR-106b|NFE2L1	EPHA7; ERBB3; STAT3
hsa-miR-106b|TBX5	DLGAP2; FURIN; MARK4; PDGFRA; PIK3R1; SPTBN1
hsa-miR-106b|YY1	DLGAP2; DYNC1LI2; PDGFRA; RPS6KA3; SPTBN1
hsa-miR-107|ATF2	FURIN; KLF4; PIK3R1; PLAG1
hsa-miR-107|ATF3	FURIN; KLF4; PIK3R1; PLAG1
hsa-miR-107|ATF4	FURIN; KLF4; PIK3R1; PLAG1
hsa-miR-107|ATF5	FURIN; KLF4; PIK3R1; PLAG1
hsa-miR-107|CEBPB	BCL2L13; PIK3R1
hsa-miR-107|CEBPE	PIK3R1
hsa-miR-107|CEBPG	PIK3R1
hsa-miR-107|CREB1	FURIN; KLF4; PIK3R1; PLAG1
hsa-miR-107|GATA1	ADAMTSL3; BCL2L13; KLF4; RPS6KA3; SIPA1L2; SPTBN1
hsa-miR-107|MAF	KLF4
hsa-miR-107|MAFB	ADAMTSL3; KLF4; SPTBN1
hsa-miR-107|SMAD1	BAI3; PIK3R1; SIPA1L2
hsa-miR-107|SMAD2	BAI3; SIPA1L2
hsa-miR-107|SMAD3	BAI3; RPS6KA3; SIPA1L2
hsa-miR-107|SMAD4	BAI3; SIPA1L2
hsa-miR-107|TBX5	ADAMTSL3; BAI3; FURIN; PIK3R1; SIPA1L2; SPTBN1
hsa-miR-107|TCF7	BCL2L13; NOTCH2; PLAG1; RPS6KA3; SIPA1L2
hsa-miR-107|TCF7L2	PLAG1
hsa-miR-107|TEAD1	FURIN; NOTCH2; PIK3R1; SIPA1L2; SPTBN1
hsa-miR-107|TFAP2A	ADAMTSL3; PIK3R1; RPS6KA3
hsa-miR-10b|IRF8	ARNT
hsa-miR-10b|MZF1	ARNT; ELAVL2; GOLGA3
hsa-miR-10b|NEUROD1	ARNT; ELAVL2
hsa-miR-10b|NR4A2	ARNT
hsa-miR-10b|RUNX2	ELAVL2; ODZ2
hsa-miR-10b|SMAD3	DLGAP2; ELAVL2
hsa-miR-10b|SMAD4	ELAVL2
hsa-miR-10b|TBX5	ARNT; DLGAP2
hsa-miR-10b|TCF7	DLGAP2; ELAVL2; GOLGA3; ODZ2
hsa-miR-10b|TFAP4	ELAVL2
hsa-miR-125a-5p|GATA1	ABCC4; SOX11
hsa-miR-125a-5p|GTF2I	STAT3
hsa-miR-125a-5p|MYF6	ABCC4; STAT3
hsa-miR-125a-5p|MYOD1	ABCC4; STAT3
hsa-miR-125a-5p|MYOG	ABCC4; STAT3
hsa-miR-125a-5p|MZF1	ABCC4; BCL2; FGFR1; KIAA1467; MSI1; SOX11; STAT3
hsa-miR-125a-5p|SMAD1	FGFR1; SOX11; ZSWIM4
hsa-miR-125a-5p|SPZ1	BCL2
hsa-miR-125a-5p|SREBF1	BCL2; FGFR1; ZSWIM4
hsa-miR-125a-5p|TCF3	ABCC4; STAT3
hsa-miR-125a-5p|TFAP2A	ABCC4; BCL2; SOX11; STAT3; ZSWIM4
hsa-miR-125a-5p|WT1	BCL2; MSI1; SOX11; STAT3
hsa-miR-125a-5p|ZFP161	ABCC4; BCL2; MSI1; SOX11
hsa-miR-130a|CEBPA	CAST; EPHA7; MEOX2; PDGFRA; TIMP2
hsa-miR-130a|CEBPB	EPHA7; MEOX2; PDGFRA; TIMP2
hsa-miR-130a|CEBPE	EPHA7; MEOX2; PDGFRA; TIMP2
hsa-miR-130a|CEBPG	EPHA7; MEOX2; PDGFRA; TIMP2
hsa-miR-130a|ELK1	CAST; CYLD; LRP2; MARK3; RPS6KA3; TRIM3; VAV2
hsa-miR-130a|ETS1	CAST; MARK3; RPS6KA3; TSC1; VAV2
hsa-miR-130a|HSF2	QSER1
hsa-miR-130a|MAFB	CAST; CYLD; ERBB3; PDGFRA; RTN1; TIMP2; TNFRSF1B; TRIM3; ZFYVE9
hsa-miR-130a|MZF1	CAST; PDGFRA; PTEN; QSER1; RPS6KA3; RTN1; TSC1
hsa-miR-130a|NEUROD1	ERBB3; KIT; MEOX2; QSER1; RPS6KA3; RTN1; TIMP2; TNFRSF1B; TRIM3; TSC1; VAV2
hsa-miR-130a|POU2F1	CAST; KIT; QSER1; RTN1
hsa-miR-130a|PURA	CYLD; ERBB3; KIT; LRP2; MARK3; MEOX2; NRP1; PTEN; QSER1; SLC9A2; TRIM3; VAV2
hsa-miR-130a|TCF7	CYLD; MEOX2; NRP1; PDGFRA; QSER1; RPS6KA3; RTN1; SIPA1L2; SLC9A2; SMAD4; TNFRSF1B
hsa-miR-130a|TEAD1	ERBB3; MEOX2; NRP1; RTN1; SIPA1L2; SMAD4; TIMP2; TNFRSF1B; ZEB1
hsa-miR-130a|WT1	ERBB3; KIT; PDGFRA; SLC9A2; TIMP2; TRIM3
hsa-miR-132|ATF5	SLC12A6
hsa-miR-132|ELK1	C18orf25; PTCH1; SLC12A6
hsa-miR-132|GATA1	C18orf25; SLC12A6; SOX11
hsa-miR-132|NFE2L1	PTCH1
hsa-miR-132|PURA	SOX11
hsa-miR-132|SP1	PTCH1; SLC12A6; SLC2A1
hsa-miR-132|SP2	PTCH1; SLC12A6; SLC2A1; SOX11
hsa-miR-132|SP3	PTCH1; SLC12A6; SLC2A1
hsa-miR-132|SP4	PTCH1; SLC12A6; SLC2A1
hsa-miR-132|SREBF2	SLC12A6; SOX11
hsa-miR-132|TBP	PTCH1
hsa-miR-132|TCF12	SLC12A6
hsa-miR-132|TCF7	PTCH1; SLC12A6
hsa-miR-132|ZBTB7A	PTCH1; SLC12A6; SLC2A1
hsa-miR-132|ZFP161	PTCH1; SLC2A1; SOX11
hsa-miR-133b|NKX2-5	BCL11A; DYNC1LI2; SGSM1
hsa-miR-133b|NR3C1	COL1A1; LRRC7
hsa-miR-133b|NR4A2	DYNC1LI2; EGFR
hsa-miR-133b|POU3F2	BCL11A; CYLD; SPTBN1
hsa-miR-133b|TBP	COL1A1; CYLD
hsa-miR-134|ELK1	PTCH1
hsa-miR-134|FOXA1	KRAS
hsa-miR-134|RUNX2	ODZ2; PTCH1
hsa-miR-134|TCF7	CPS1; ODZ2; PTCH1
hsa-miR-134|YY1	PTCH1
hsa-miR-137|ALX1	BCL11A
hsa-miR-137|CEBPA	PDGFRA; SLC12A6
hsa-miR-137|HMGA1	ADAM15; BAI3; PDGFRA; QSER1; SEMA3B; SLC12A6; TRIM3
hsa-miR-137|MZF1	ADAM15; CACNA1H; GOLGA3; KLF4; NOTCH1; PDGFRA; QSER1; RPS6KA3; SEMA3B; SOX11
hsa-miR-137|NEUROD1	CACNA1H; KLF4; MYO1B; NOTCH1; QSER1; RPS6KA3; SEMA3B; SLC12A6; SOX11; TRIM3
hsa-miR-137|POU2F1	BCL11A; MYO1B; NOTCH1; QSER1
hsa-miR-137|RFX1	KLF4; SLC12A6
hsa-miR-137|RORB	MYO1B; SOX11
hsa-miR-137|SOX10	ADAM15; BCL11A; CACNA1H; IDH1; MYO1B; SLC12A6; SOX11; TRIM3
hsa-miR-137|SP2	ADAM15; BCL11A; BCL2L13; CACNA1H; GOLGA3; KLF4; MYO1B; NOTCH1; QSER1; RPS6KA3; SLC12A6; SOX11; TRIM3
hsa-miR-137|SP3	ADAM15; BCL11A; BCL2L13; CACNA1H; GOLGA3; KLF4; MYO1B; NOTCH1; QSER1; RPS6KA3; SLC12A6; TRIM3
hsa-miR-137|SP4	ADAM15; BCL11A; BCL2L13; CACNA1H; GOLGA3; KLF4; MYO1B; NOTCH1; QSER1; RPS6KA3; SLC12A6; TRIM3
hsa-miR-137|SREBF2	BCL11A; BCL2L13; CACNA1H; KLF4; MYO1B; NOTCH1; NRP1; PDGFRA; RPS6KA3; SEMA3B; SLC12A6; SOX11
hsa-miR-137|TBX5	BAI3; CACNA1H; IDH1; MYO1B; NOTCH1; PDGFRA
hsa-miR-137|TCF12	KLF4; RPS6KA3; SEMA3B; SLC12A6
hsa-miR-137|TCF7	ADAM15; BCL2L13; GOLGA3; IDH1; NRP1; PDGFRA; QSER1; RPS6KA3; SLC12A6
hsa-miR-138|GATA1	ADAMTSL3; PTPN11; TCF12; UPF2
hsa-miR-138|MZF1	ADAMTSL3; MSI1; UPF2
hsa-miR-138|SOX10	TCF12
hsa-miR-138|TBX5	ADAMTSL3; UPF2
hsa-miR-139-5p|HNF1B	TOP1
hsa-miR-139-5p|MAX	TOP1
hsa-miR-139-5p|MYC	TOP1
hsa-miR-139-5p|MZF1	CNOT1; TOP1
hsa-miR-139-5p|SMAD3	TOP1
hsa-miR-139-5p|SREBF2	CNOT1
hsa-miR-139-5p|TBX5	TOP1
hsa-miR-139-5p|TCF7	TCF12; TOP1
hsa-miR-139-5p|TEAD1	TCF12
hsa-miR-139-5p|USF2	TOP1
hsa-miR-143|ELK1	ABCC4; BCL2
hsa-miR-143|EP300	ERBB3; PDGFRA
hsa-miR-143|MZF1	ABCC4; BCL2; COL1A1; KRAS; PDGFRA
hsa-miR-143|SREBF2	ABCC4; BCL2; ERBB3; PDGFRA
hsa-miR-143|YY1	PDGFRA
hsa-miR-144|CRX	AGRN; ELAVL2; MYCN; QSER1; SPTBN1
hsa-miR-144|EP300	MET; PTCH1; SOX11
hsa-miR-144|GATA1	ADAMTSL3; EPHA7; MET; SOX11; SPTBN1
hsa-miR-144|MAFB	ADAMTSL3; ELAVL2; MET; SPTBN1
hsa-miR-144|NEUROD1	AGRN; ARID1A; ELAVL2; MET; QSER1; SOX11; SPTBN1; TGFBR2
hsa-miR-144|PURA	ADAMTSL3; AGRN; BCL11A; LRP2; PTEN; QSER1; SOX11
hsa-miR-144|SMAD1	BCL11A; ELAVL2; EPHA7; MET; MYCN; SOX11
hsa-miR-144|SMAD3	ELAVL2; MET
hsa-miR-144|TCF7	ARID1A; ELAVL2; MYCN; PLAG1; PTCH1; QSER1; SMAD4
hsa-miR-144|TEAD1	MSI1; MYCN; PTCH1; SMAD4; SPTBN1
hsa-miR-145|CRX	FLI1; MYCN; QSER1
hsa-miR-145|ELF4	FLI1
hsa-miR-145|ETV4	FLI1
hsa-miR-145|ETV6	FLI1
hsa-miR-145|MZF1	FLI1; KLF4; MYCN; QSER1; SOX11
hsa-miR-145|NEUROD1	ERBB3; KLF4; QSER1; SOX11
hsa-miR-145|SPIB	FLI1
hsa-miR-145|TCF7	MYCN; QSER1; SMAD4
hsa-miR-150|ETV4	PIK3R1
hsa-miR-150|FOXA1	MAPK13
hsa-miR-150|PURA	RIMBP2
hsa-miR-150|SMAD1	PIK3R1
hsa-miR-150|SOX10	PIK3R1
hsa-miR-150|TBX5	PIK3R1; RIMBP2
hsa-miR-152|ELK1	BCL11A; C18orf25; CAST; NRAS; VAV2
hsa-miR-152|FOS	MET
hsa-miR-152|FOSL1	MET
hsa-miR-152|JUN	MET
hsa-miR-152|JUNB	MET
hsa-miR-152|JUND	MET
hsa-miR-152|MAFB	CAST; MET; NRAS; TNFRSF1B
hsa-miR-152|NEUROD1	KIT; MET; NRAS; SOX11; TNFRSF1B; VAV2
hsa-miR-152|SOX10	BCL11A; KIT; NRAS; PTEN; SOX11; VAV2
hsa-miR-152|TBX5	NRAS; TNFRSF1B
hsa-miR-152|WT1	BCL11A; KIT; SOX11
hsa-miR-152|ZFP161	KIT; SLC2A1; SOX11; VAV2
hsa-miR-154|ETV4	TCF12
hsa-miR-154|GATA1	TCF12
hsa-miR-154|TEAD1	TCF12
hsa-miR-181c|FOXO1	ELAVL2; KLF6; PDGFRA
hsa-miR-181c|FOXO3	ELAVL2; KLF6; KRAS
hsa-miR-181c|GATA1	ARNT2; CNOT1; CTTNBP2NL; FLT1; NPTXR; PDGFRA
hsa-miR-181c|MZF1	ARNT2; BCL2; CNOT1; CTTNBP2NL; ELAVL2; FLT1; KLF6; KRAS; LMX1A; MSI1; PDGFRA; QSER1; SEMA3B
hsa-miR-181c|NR4A2	ARNT2; QSER1
hsa-miR-181c|POU2F1	ELAVL2; GRIA2; QSER1
hsa-miR-181c|SMAD1	ATP8B1; BAI3; ELAVL2; GRIA2; NRP1; PDGFRA; SEMA3B; TRIM3
hsa-miR-181c|SMAD3	ATP8B1; BAI3; DLGAP2; ELAVL2; GRIA2; NRP1
hsa-miR-181c|SMAD4	ATP8B1; BAI3; ELAVL2; GRIA2; NRP1
hsa-miR-181c|TFAP2A	ARNT2; BCL2; CYLD; DLGAP2; FLT1; KLF6; NPTXR; QSER1; TRIM3; TRRAP
hsa-miR-182|CEBPA	EPHA7; PDGFRA; PIK3R1
hsa-miR-182|CEBPB	EPHA7; PDGFRA; PIK3R1
hsa-miR-182|CEBPE	EPHA7; PDGFRA; PIK3R1
hsa-miR-182|CEBPG	EPHA7; PDGFRA; PIK3R1
hsa-miR-182|CRX	BCL2; CYLD; DCX; ELAVL2; PDGFRA; PIK3R1; QSER1
hsa-miR-182|ELK1	BCL2; CYLD; DLGAP2; ELAVL2; FOXO3; NF1; VAV2
hsa-miR-182|ETS1	NF1; VAV2
hsa-miR-182|MZF1	BCL2; ELAVL2; FN1; NF1; PDGFRA; PHLDB1; PIK3R1; QSER1; SOX11
hsa-miR-182|NEUROD1	ELAVL2; PHLDB1; QSER1; SOX11; VAV2
hsa-miR-182|NKX2-5	ELAVL2; FOXO3; NF1
hsa-miR-182|PURA	BCL2; CYLD; DLGAP2; FOXO3; QSER1; SLC9A2; SOX11; VAV2
hsa-miR-182|SREBF1	BCL2; CYLD; FN1; NF1; PDGFRA
hsa-miR-182|SREBF2	BCL2; CYLD; DLGAP2; NF1; PDGFRA; SLC9A2; SOX11
hsa-miR-182|TCF7	BCL2; CYLD; DCX; DLGAP2; ELAVL2; FN1; NF1; PDGFRA; QSER1; SCN9A; SLC9A2
hsa-miR-183|ATF5	EPHA4; PLAG1
hsa-miR-183|GTF2I	PTCH1; RPS6KA3
hsa-miR-183|MAFB	C8B; DCX; PRKCA
hsa-miR-183|NEUROD1	C8B; RPS6KA3; TSC1
hsa-miR-183|RFX1	PTCH1; RIMBP2
hsa-miR-183|SOX10	CACNA1E; EPHA4; TSC1
hsa-miR-183|SREBF1	CACNA1E; RPS6KA3
hsa-miR-183|TFAP2A	PTCH1; RPS6KA3
hsa-miR-183|TFAP4	C8B; RPS6KA3
hsa-miR-185|GATA2	GPR61
hsa-miR-185|MAFB	GPR61; PHLDB1
hsa-miR-185|MZF1	MSI1; PHLDB1
hsa-miR-185|NEUROD1	GPR61; PHLDB1
hsa-miR-185|TEAD1	GPR61; MSI1; PHLDB1
hsa-miR-190|ELK1	BCL11A; PTCH1
hsa-miR-190|LEF1	SMAD4
hsa-miR-190|MZF1	PTCH1; SGSM1
hsa-miR-190|POU2F1	BCL11A
hsa-miR-190|SMAD1	BCL11A
hsa-miR-190|SOX10	BCL11A
hsa-miR-190|TCF7	PTCH1; SMAD4
hsa-miR-190|TEAD1	PTCH1; SMAD4
hsa-miR-191|ELK1	BCL11A
hsa-miR-191|MZF1	MSI1
hsa-miR-191|PURA	BCL11A
hsa-miR-191|SOX10	BCL11A
hsa-miR-191|SP1	BCL11A
hsa-miR-191|SP2	BCL11A
hsa-miR-191|SP3	BCL11A
hsa-miR-191|SP4	BCL11A
hsa-miR-191|SREBF1	BCL11A
hsa-miR-191|TEAD1	MSI1
hsa-miR-195|ELK1	ADAMTSL3; BCL2; CACNA1E; CYLD; DLGAP2; FGFR1; NF1; PTCH1; RPS6KA3; VAV2; WEE1
hsa-miR-195|ERF	ADAMTSL3; VAV2; WEE1
hsa-miR-195|ETS1	ADAMTSL3; CACNA1E; FGFR1; NF1; RPS6KA3; TSC1; VAV2; WEE1
hsa-miR-195|FLI1	ADAMTSL3; CACNA1E; NF1; VAV2; WEE1
hsa-miR-195|GATA1	ADAMTSL3; CACNA1E; IRS1; KCTD8; NF1; RPS6KA3; TSC1
hsa-miR-195|SREBF1	BCL2; CACNA1E; CYLD; DHTKD1; FGFR1; INSR; NF1; RPS6KA3; UNG
hsa-miR-195|TBX5	ADAMTSL3; CACNA1E; DLGAP2; FGFR1; FURIN; INSR; NF1; TSC1
hsa-miR-195|TCF7	BCL2; CACNA1E; CYLD; DHTKD1; DLGAP2; NF1; NOTCH2; PIM1; PTCH1; RPS6KA3
hsa-miR-195|YY1	DLGAP2; PTCH1; RPS6KA3; TSC1
hsa-miR-195|ZBTB7A	BCL2; CYLD; IRS1; NF1; PTCH1
hsa-miR-196b|CRX	COL3A1; NRAS; PDGFRA
hsa-miR-196b|FOXO1	NRAS; PDGFRA
hsa-miR-196b|GATA1	COL3A1; PDGFRA; SOX11; TSC1
hsa-miR-196b|GATA2	COL3A1; PDGFRA
hsa-miR-196b|GATA3	COL3A1; PDGFRA
hsa-miR-196b|GATA4	COL3A1; PDGFRA
hsa-miR-196b|GATA5	COL3A1; PDGFRA
hsa-miR-196b|GATA6	COL3A1; PDGFRA
hsa-miR-196b|MAX	NRAS; SOX11; TSC1
hsa-miR-196b|MYC	NRAS; SOX11; TSC1
hsa-miR-196b|NEUROD1	COL1A1; NRAS; SOX11; TSC1
hsa-miR-196b|NR3C1	COL1A1
hsa-miR-196b|POU2F1	BCL11A; NRAS
hsa-miR-196b|SREBF2	BCL11A; DLGAP2; PDGFRA; SOX11
hsa-miR-196b|TBP	COL1A1; COL3A1
hsa-miR-196b|WT1	BCL11A; COL1A2; PDGFRA; SOX11
hsa-miR-196b|ZBTB7A	BCL11A; PDGFRA
hsa-miR-203|ELK1	ATM; CACNA1E; SPARC; UPF2; ZSWIM4
hsa-miR-203|FOS	ZSWIM4
hsa-miR-203|GATA1	ATM; CACNA1E; DCX; PDGFRA; PRKCA; SPARC; SPTBN1; UPF2
hsa-miR-203|IRF1	CACNA1E; PDGFRA
hsa-miR-203|IRF2	CACNA1E
hsa-miR-203|IRF5	CACNA1E
hsa-miR-203|IRF8	CACNA1E; PDGFRA; ZSWIM4
hsa-miR-203|MAF	ZSWIM4
hsa-miR-203|MAFB	DCX; PDGFRA; PRKCA; SPARC; SPTBN1; ZSWIM4
hsa-miR-203|MYOG	SPARC; SPTBN1
hsa-miR-203|MZF1	CACNA1E; CNTFR; PDGFRA; UPF2
hsa-miR-203|SP2	ATM; CACNA1E; CNTFR; UPF2; ZSWIM4
hsa-miR-203|SP3	CACNA1E; CNTFR; UPF2; ZSWIM4
hsa-miR-203|SREBF1	CACNA1E; PDGFRA; SPTBN1; ZSWIM4
hsa-miR-203|SREBF2	CACNA1E; PDGFRA; PRKCA; SPARC; ZSWIM4
hsa-miR-203|TCF3	ATM; SPTBN1
hsa-miR-203|TCF7	ATM; CACNA1E; DCX; PDGFRA
hsa-miR-203|ZBTB7A	PDGFRA; ZSWIM4
hsa-miR-204|GATA1	DCX; PDGFRB; PTPN11; SOX11; TRMT5
hsa-miR-204|GATA2	DCX; PDGFRB
hsa-miR-204|GATA3	PDGFRB; TRMT5
hsa-miR-204|HMGA1	DCX; PTPN11
hsa-miR-204|LEF1	ATP8B1; DCX; PDGFRB; SMAD4
hsa-miR-204|NFE2L1	LAMP1; PDGFRB; PTCH1
hsa-miR-204|SMAD1	ATP8B1; BCL11A; DCX; ROR2; SOX11
hsa-miR-204|SOX10	BCL11A; SOX11
hsa-miR-204|TCF7	ATP8B1; DCX; PDGFRB; PTCH1; SMAD4
hsa-miR-204|TEAD1	LAMP1; PDGFRB; PTCH1; PTPN11; SMAD4; TRMT5
hsa-miR-218|ATF2	ABCC4; BCL11A; SGSM1
hsa-miR-218|ATF3	ABCC4; BCL11A; SGSM1
hsa-miR-218|ATF4	ABCC4; BCL11A; SGSM1
hsa-miR-218|ATF5	ABCC4; BCL11A; SGSM1
hsa-miR-218|CREB1	ABCC4; BCL11A; SGSM1
hsa-miR-218|ELK1	ABCC4; BCL11A; GRIA2; RPS6KA3; TAOK3
hsa-miR-218|ETS1	ABCC4; GRIA2; RPS6KA3
hsa-miR-218|FOS	SGSM1
hsa-miR-218|GATA1	ABCC4; DCX; KIT; RPS6KA3; SOX11
hsa-miR-218|HOXA5	FRMPD4; QSER1
hsa-miR-218|IRF6	FRMPD4; QSER1
hsa-miR-218|NEUROD1	ABCC4; KIT; QSER1; RPS6KA3; SOX11; SV2B; TAOK3
hsa-miR-218|POU2F1	BCL11A; DCX; GRIA2; KIT; QSER1
hsa-miR-218|POU3F2	BCL11A; KIT
hsa-miR-218|SMAD1	BCL11A; DCX; FRMPD4; GRIA2; SOX11; TAOK3
hsa-miR-218|SOX10	BCL11A; KIT; SOX11
hsa-miR-218|SREBF2	ABCC4; BCL11A; KIT; RPS6KA3; SGSM1; SOX11
hsa-miR-219-5p|ATF2	BCL11A; FURIN
hsa-miR-219-5p|ATF3	BCL11A; FURIN
hsa-miR-219-5p|ATF4	BCL11A; FURIN
hsa-miR-219-5p|ATF5	BCL11A; FURIN
hsa-miR-219-5p|CREB1	BCL11A; FURIN
hsa-miR-219-5p|CRX	FURIN; SPTBN1; TCF12; WEE1
hsa-miR-219-5p|EGR1	BCL11A
hsa-miR-219-5p|EGR2	BCL11A
hsa-miR-219-5p|EGR3	BCL11A
hsa-miR-219-5p|ELK1	BCL11A; TCF12; WEE1
hsa-miR-219-5p|GATA1	GPR61; SPTBN1; TCF12; THSD7B
hsa-miR-219-5p|HIF1A	BCL11A; WEE1
hsa-miR-219-5p|NEUROD1	GPR61; SPTBN1; THSD7B
hsa-miR-219-5p|NR4A2	WEE1
hsa-miR-219-5p|POU2F1	BCL11A; THSD7B
hsa-miR-219-5p|PURA	BCL11A; GPR61
hsa-miR-219-5p|SP1	BCL11A; FURIN; WEE1
hsa-miR-219-5p|SP2	BCL11A; FURIN; WEE1
hsa-miR-219-5p|SP3	BCL11A; FURIN
hsa-miR-219-5p|SP4	BCL11A; FURIN
hsa-miR-219-5p|SREBF1	BCL11A; SPTBN1
hsa-miR-219-5p|SREBF2	BCL11A; SMAD4
hsa-miR-219-5p|TEAD1	FURIN; GPR61; SMAD4; SPTBN1; TCF12; THSD7B
hsa-miR-219-5p|TFAP4	GPR61; SPTBN1
hsa-miR-219-5p|WT1	BCL11A
hsa-miR-21|DBP	PTCH1
hsa-miR-21|HMGA1	CNTFR; PI15; TGFBR2
hsa-miR-21|LEF1	PLAG1
hsa-miR-21|SMAD3	PI15; RPS6KA3
hsa-miR-21|TCF7	BCL2; PLAG1; PTCH1; RPS6KA3
hsa-miR-21|TEAD1	CNTFR; PI15; PIK3R1; PTCH1; TRMT5
hsa-miR-21|YY1	PTCH1; RPS6KA3
hsa-miR-221|CEBPA	TIMP2
hsa-miR-221|CEBPB	TIMP2
hsa-miR-221|CEBPE	TIMP2
hsa-miR-221|CEBPG	TIMP2
hsa-miR-221|CRX	DCX; WEE1
hsa-miR-221|GATA1	C18orf25; DCX; SOX11
hsa-miR-221|GATA2	DCX; SEMA3B
hsa-miR-221|GATA3	SEMA3B
hsa-miR-221|HMGA1	DCX; SEMA3B; WEE1
hsa-miR-221|NEUROD1	SEMA3B; SOCS1; SOX11; TIMP2
hsa-miR-221|NR3C1	DCX
hsa-miR-221|TCF7	DCX; SOCS1
hsa-miR-222|CEBPA	TIMP2
hsa-miR-222|CEBPB	TIMP2
hsa-miR-222|CEBPE	TIMP2
hsa-miR-222|CEBPG	TIMP2
hsa-miR-222|CRX	DCX; WEE1
hsa-miR-222|GATA1	C18orf25; DCX; SOX11
hsa-miR-222|HMGA1	DCX; SEMA3B; WEE1
hsa-miR-222|MZF1	SEMA3B; SOX11
hsa-miR-222|NEUROD1	SEMA3B; SOCS1; SOX11; TIMP2
hsa-miR-222|NR3C1	DCX
hsa-miR-222|STAT1	WEE1
hsa-miR-222|STAT5A	WEE1
hsa-miR-222|STAT5B	WEE1
hsa-miR-222|TCF7	DCX; SOCS1
hsa-miR-222|TEAD1	FOXO3; TIMP2
hsa-miR-223|TBX5	BAI3
hsa-miR-23a|ELK1	CTTNBP2NL; DLGAP2; PTPN11
hsa-miR-23a|ETS1	CTTNBP2NL; PTPN11
hsa-miR-23a|FLI1	CTTNBP2NL
hsa-miR-23a|MZF1	ARNT; ARNT2; CTTNBP2NL; MSI1; PTEN; SOX11
hsa-miR-23a|NEUROD1	ARNT; SOX11
hsa-miR-23a|NR4A2	ARNT; ARNT2
hsa-miR-23a|SMAD3	DLGAP2; ZEB1
hsa-miR-23a|SREBF2	DLGAP2; SOX11
hsa-miR-23a|TBX5	ARNT; ARNT2; CTTNBP2NL; DLGAP2; ZEB1
hsa-miR-23b|CRX	ARNT; ARNT2; CTTNBP2NL; ZEB1
hsa-miR-23b|FOXA1	ZEB1
hsa-miR-23b|IRF8	ARNT
hsa-miR-23b|NEUROD1	ARNT; SOX11
hsa-miR-23b|NR4A2	ARNT; ARNT2
hsa-miR-25|GATA1	C18orf25; DCX; NF1; SNX13
hsa-miR-25|GATA2	DCX; NF1; SNX13
hsa-miR-25|MAF	SNX13
hsa-miR-25|MAFB	DCX; NF1; SNX13
hsa-miR-25|MZF1	AXL; CACNA1H; NF1; NOTCH1; QSER1; RIMBP2
hsa-miR-25|NEUROD1	AXL; CACNA1H; MYO1B; NOTCH1; QSER1
hsa-miR-25|NKX2-5	NF1; SNX13
hsa-miR-25|PURA	AXL; CACNA1H; DLGAP2; MYO1B; NOTCH1; QSER1; RIMBP2; SLC9A2
hsa-miR-25|SMAD1	BAI3; DCX; NF1; SLC9A2
hsa-miR-25|TBX5	BAI3; CACNA1H; DCX; DLGAP2; MYO1B; NF1; NOTCH1; RIMBP2
hsa-miR-25|ZBTB7A	BAI3; CACNA1H; MYO1B; NF1; QSER1
hsa-miR-26b|ELK1	BCL11A; C18orf25; ELAVL2; RB1
hsa-miR-26b|EP300	C18orf25; KLF4; PDGFRA; SLC9A2
hsa-miR-26b|MAF	ELAVL2; KLF4
hsa-miR-26b|MAFB	ELAVL2; KLF4; PDGFRA; RTN1
hsa-miR-26b|MAX	KLF4; SLC9A2
hsa-miR-26b|MYC	KLF4; SLC9A2
hsa-miR-26b|MZF1	ELAVL2; KLF4; PDGFRA; PTEN; RTN1
hsa-miR-26b|NR3C1	ELAVL2; EPHA7
hsa-miR-26b|SREBF1	BCL11A; PDGFRA
hsa-miR-26b|SREBF2	BCL11A; KLF4; PDGFRA; RB1; RTN1; SLC9A2; SMAD4
hsa-miR-26b|STAT1	SLC9A2
hsa-miR-26b|STAT2	SLC9A2
hsa-miR-26b|STAT3	PDGFRA; SLC9A2
hsa-miR-26b|STAT4	SLC9A2
hsa-miR-26b|STAT5A	SLC9A2
hsa-miR-26b|STAT5B	SLC9A2
hsa-miR-26b|STAT6	SLC9A2
hsa-miR-26b|TCF7	ELAVL2; PDGFRA; RTN1; SLC26A4; SLC9A2; SMAD4
hsa-miR-26b|TEAD1	RB1; RTN1; SMAD4
hsa-miR-26b|USF2	KLF4; SLC9A2
hsa-miR-27a|BCL6	DCX; MET; PRKCD
hsa-miR-27a|ELK1	ADAMTSL3; AGRN; BCL11A; ELAVL2; GATA3; MN1; NF1; NPTXR; PRKCD; PTCH1; VAV2
hsa-miR-27a|ETS1	ADAMTSL3; NF1; PRKCD; VAV2
hsa-miR-27a|ETV4	ELAVL2; VAV2
hsa-miR-27a|FLI1	ADAMTSL3; NF1; VAV2
hsa-miR-27a|MZF1	ADAMTSL3; AGRN; CNOT1; ELAVL2; ID3; IRS1; KRAS; MET; MN1; NF1; PDGFRA; PTCH1; SEMA3B; SOX11
hsa-miR-27a|NEUROD1	AGRN; ELAVL2; GATA3; IRS1; MET; NPTXR; PRKCD; SEMA3B; SOX11; VAV2
hsa-miR-27a|NKX2-5	AGRN; BCL11A; ELAVL2; NF1
hsa-miR-27a|POU2F1	BCL11A; DCX; ELAVL2; RPN1
hsa-miR-27a|SMAD3	ELAVL2; GATA3; ID3; MET; MN1
hsa-miR-27a|SREBF1	BCL11A; CNOT1; NF1; PDGFRA; SEMA3B
hsa-miR-27a|SREBF2	ADAMTSL3; BCL11A; CNOT1; IRS1; NF1; PDGFRA; SEMA3B; SOX11
hsa-miR-27a|TCF12	NPTXR; SEMA3B; VAV2
hsa-miR-27b|CRX	AGRN; DCX; ELAVL2; ID3; PDGFRA
hsa-miR-27b|MAF	ELAVL2; MET
hsa-miR-27b|MAFB	ADAMTSL3; CNOT1; DCX; ELAVL2; ID3; MET; NF1; PDGFRA; PRKCD; SEMA3B
hsa-miR-27b|MYOG	IRS1; NPTXR; SEMA3B; VAV2
hsa-miR-27b|NEUROD1	AGRN; ELAVL2; GATA3; IRS1; MET; NPTXR; PRKCD; SEMA3B; SOX11; VAV2
hsa-miR-27b|NFYA	CNOT1
hsa-miR-27b|NFYB	CNOT1
hsa-miR-27b|NFYC	CNOT1
hsa-miR-27b|NKX2-5	AGRN; BCL11A; ELAVL2; NF1
hsa-miR-27b|NR3C1	DCX; ELAVL2; PRKCD
hsa-miR-27b|POU3F2	BCL11A; KRAS; RPN1
hsa-miR-27b|SMAD1	BCL11A; DCX; ELAVL2; GATA3; ID3; MET; NF1; PDGFRA; SEMA3B; SOX11
hsa-miR-29c|GATA1	ARNT; DCX; KLF4; PDGFRB; RPS6KA3; SPARC; SPTBN1
hsa-miR-29c|MAFB	DCX; FOXO3; KLF4; PDGFRB; SPARC; SPTBN1
hsa-miR-29c|NEUROD1	ARNT; COL1A1; KLF4; RPS6KA3; SPARC; SPTBN1
hsa-miR-29c|POU3F2	PI15; SPTBN1
hsa-miR-29c|SMAD3	COL1A2; DLGAP2; PI15; RPS6KA3; SPARC
hsa-miR-29c|TBX5	ARNT; COL1A2; DCX; DLGAP2; FOXO3; PIK3R1; SPARC; SPTBN1
hsa-miR-29c|TEAD1	COL1A2; FOXO3; LMX1A; NOTCH2; PDGFRB; PI15; PIK3R1; SPARC; SPTBN1
hsa-miR-30d|DBP	BCL11A; TIMP2
hsa-miR-30d|ETV4	PDGFRB; VAV2
hsa-miR-30d|FOXA1	KRAS
hsa-miR-30d|FOXO1	FOXO3; NF1
hsa-miR-30d|FOXO4	FOXO3
hsa-miR-30d|HMGA1	DCX; LYST
hsa-miR-30d|POU2F1	BCL11A; DCX; NOTCH1
hsa-miR-30d|YY1	BCL11A; DLGAP2; FOXO3; TSC1
hsa-miR-30e|CRX	BCL2; DCX; IDH1
hsa-miR-30e|ETV4	PDGFRB; VAV2
hsa-miR-30e|MAFB	DCX; FOXO3; NF1; PDGFRB; TIMP2
hsa-miR-30e|MZF1	BCL2; KRAS; NF1; NOTCH1; PDGFRB; SOX11; TSC1
hsa-miR-30e|NEUROD1	LYST; NOTCH1; SOX11; TIMP2; TSC1; VAV2
hsa-miR-30e|POU3F2	BCL11A; KRAS; NOTCH1
hsa-miR-30e|SOX10	BCL11A; FOXO3; IDH1; SOX11; TIMP2; TSC1; VAV2
hsa-miR-30e|TBX5	DCX; DLGAP2; FOXO3; IDH1; NF1; NOTCH1; TSC1
hsa-miR-30e|TCF7	ATP8B1; BCL2; DCX; DLGAP2; IDH1; NF1; PDGFRB
hsa-miR-30e|TCF7L2	ATP8B1; DLGAP2
hsa-miR-31|NR3C1	ELAVL2
hsa-miR-31|RUNX2	ELAVL2
hsa-miR-31|SMAD1	DOCK1; ELAVL2; SOX11
hsa-miR-31|TCF7	ELAVL2; SCN9A
hsa-miR-31|YY1	DOCK1
hsa-miR-31|ZEB1	SCN9A
hsa-miR-346|GATA1	KLF4
hsa-miR-346|JUN	KLF4
hsa-miR-346|MAF	KLF4
hsa-miR-346|MAFB	KLF4
hsa-miR-346|MYOG	KLF4
hsa-miR-346|NEUROD1	KLF4
hsa-miR-346|NFE2L1	KLF4
hsa-miR-346|TCF12	KLF4
hsa-miR-346|TFAP4	KLF4
hsa-miR-34a|ELK1	BCL2; CACNA1E; TCF12
hsa-miR-34a|MAF	MET
hsa-miR-34a|MAFB	DCX; JAG1; MET; PDGFRA
hsa-miR-34a|MZF1	BCL2; CACNA1E; MET; MYCN; NOTCH2; PDGFRA
hsa-miR-34a|NEUROD1	JAG1; MET
hsa-miR-34a|SREBF1	BCL2; CACNA1E; PDGFRA
hsa-miR-34a|STAT3	PDGFRA
hsa-miR-375|FOS	ELAVL2; KLF4
hsa-miR-375|FOSB	ELAVL2; KLF4
hsa-miR-375|FOSL1	ELAVL2; KLF4
hsa-miR-375|JUN	ELAVL2; KLF4
hsa-miR-375|JUNB	ELAVL2; KLF4
hsa-miR-375|MAFB	ELAVL2; KLF4
hsa-miR-375|MYOG	KLF4; SYP
hsa-miR-375|SP2	CDKN2B; KLF4; SYP
hsa-miR-375|SP3	CDKN2B; KLF4; SYP
hsa-miR-375|SP4	CDKN2B; KLF4; SYP
hsa-miR-375|TCF12	KLF4
hsa-miR-375|ZEB1	CDKN2B; SYP
hsa-miR-379|MAFB	INSR
hsa-miR-379|TBX5	INSR
hsa-miR-383|CRX	ELAVL2
hsa-miR-383|FOXO1	ELAVL2
hsa-miR-383|FOXO3	ELAVL2
hsa-miR-383|GATA1	SOX11
hsa-miR-383|NR3C1	ELAVL2
hsa-miR-383|POU2F1	ELAVL2
hsa-miR-383|RORB	SOX11
hsa-miR-383|SOX10	SOX11
hsa-miR-383|TCF7	ELAVL2
hsa-miR-425|CEBPA	TIMP2
hsa-miR-425|CEBPB	TIMP2
hsa-miR-425|CEBPE	TIMP2
hsa-miR-425|CEBPG	TIMP2
hsa-miR-425|NEUROD1	TIMP2
hsa-miR-425|SOX10	TIMP2
hsa-miR-425|TEAD1	TIMP2
hsa-miR-425|TFAP4	TIMP2
hsa-miR-451|GATA1	TSC1
hsa-miR-451|MZF1	TSC1
hsa-miR-451|NEUROD1	TSC1
hsa-miR-451|SMAD1	TSC1
hsa-miR-495|ATF2	BCL11A; CYLD; FOXO3; NPTXR; PIK3R1
hsa-miR-495|ATF3	BCL11A; CYLD; FOXO3; NPTXR; PIK3R1
hsa-miR-495|ATF4	BCL11A; CYLD; FOXO3; NPTXR; PIK3R1
hsa-miR-495|ATF5	BCL11A; CYLD; FOXO3; NPTXR; PIK3R1
hsa-miR-495|CREB1	BCL11A; CYLD; FOXO3; NPTXR; PIK3R1
hsa-miR-495|GATA1	CSNK1E; IRS1; MET; NPTXR; PRKCA; RPS6KA3; SLC26A4; SPARC
hsa-miR-495|GATA2	SLC26A4; SPARC
hsa-miR-495|GATA3	NPTXR; SLC26A4; SPARC
hsa-miR-495|GATA4	SPARC
hsa-miR-495|GATA5	SPARC
hsa-miR-495|GATA6	SPARC
hsa-miR-495|MAFB	CSNK1E; CYLD; FOXO3; MET; ODZ2; PRKCA; SPARC; TIMP2; TNFRSF1B
hsa-miR-495|MZF1	HSP90AA1; IRS1; LRRK1; MET; MSI1; NOTCH1; PIK3R1; PTCH1; PTEN; RPS6KA3
hsa-miR-495|NEUROD1	CSNK1E; IRS1; MET; NOTCH1; NPTXR; RPS6KA3; SPARC; TIMP2; TNFRSF1B
hsa-miR-495|RORB	HSP90AA1
hsa-miR-495|SMAD1	BAI3; BCL11A; CSNK1E; MET; PIK3R1; SLC26A4; SPARC; TIMP2
hsa-miR-495|SOX10	BCL11A; CSNK1E; FOXO3; PIK3R1; PTEN; TIMP2
hsa-miR-495|TCF3	CYLD; FOXO3; HSP90AA1; NPTXR; PIK3R1; SLC26A4; TNFRSF1B
hsa-miR-495|TCF7	CYLD; DLGAP2; HSP90AA1; ODZ2; PTCH1; RPS6KA3; SLC26A4; TNFRSF1B
hsa-miR-503|CRX	BCL2; LRRK1; PIK3R1; WEE1
hsa-miR-503|ELK1	BCL2; DLGAP2; WEE1
hsa-miR-503|ERF	WEE1
hsa-miR-503|FLI1	WEE1
hsa-miR-503|FOXO3	INSR
hsa-miR-503|HMGA1	EPHA7; SIPA1L2; WEE1
hsa-miR-503|IRF8	BCL2
hsa-miR-503|MZF1	BCL2; INSR; LRRK1; PIK3R1
hsa-miR-503|SMAD1	CHEK1; EPHA7; PIK3R1; SIPA1L2
hsa-miR-503|TCF7	BCL2; DLGAP2; ODZ2; PLAG1; SIPA1L2
hsa-miR-92b|ELK1	C18orf25; DLGAP2; NF1; NOTCH1
hsa-miR-92b|EP300	C18orf25; CACNA1H; MYO1B; NOTCH1; RIMBP2; SLC9A2; SNX13
hsa-miR-92b|MZF1	AXL; CACNA1H; NF1; NOTCH1; QSER1; RIMBP2
hsa-miR-92b|PURA	AXL; CACNA1H; DLGAP2; MYO1B; NOTCH1; QSER1; RIMBP2; SLC9A2
hsa-miR-92b|SOX10	CACNA1H; MYO1B; SLC9A2
hsa-miR-92b|SP2	CACNA1H; MYO1B; NOTCH1; QSER1; SLC9A2
hsa-miR-92b|WT1	CACNA1H; NF1; NOTCH1; SLC9A2
hsa-miR-92b|ZBTB7A	BAI3; CACNA1H; MYO1B; NF1; QSER1
hsa-miR-93|GATA1	CSGALNACT1; EPHA4; EPHA7; ERBB3; MARK4; NTRK3; PDGFRA; RPS6KA3; SPTBN1
hsa-miR-93|GATA2	CSGALNACT1; EPHA7; PDGFRA; SPTBN1
hsa-miR-93|MAFB	CSGALNACT1; CYLD; ERBB3; PDGFRA; SPTBN1; TIMP2; WEE1
hsa-miR-93|MZF1	EPHA4; MARK4; NTRK3; PDGFRA; PIK3R1; PTEN; RPS6KA3; STAT3; SV2B
hsa-miR-93|NEUROD1	CSGALNACT1; DYNC1LI2; ERBB3; RB1; RPS6KA3; SPTBN1; STAT3; SV2B; TIMP2; VAV2
hsa-miR-93|NFE2L1	EPHA7; ERBB3; STAT3
hsa-miR-93|PURA	CYLD; DLGAP2; ERBB3; MARK4; PTEN; SLC9A2; VAV2
hsa-miR-93|TBX5	DLGAP2; FURIN; MARK4; PDGFRA; PIK3R1; SPTBN1
hsa-miR-98|CRX	MYCN; NRAS; TP53
hsa-miR-98|GATA1	CACNA1E; EPHA4; NTRK3; RPS6KA3; STEAP3; TP53; TSC1
hsa-miR-98|SMAD1	CACNA1E; COL1A1; MYCN; RB1; STEAP3; TSC1
hsa-miR-98|SOX10	CACNA1E; COL1A1; EPHA4; MYCN; NRAS; STEAP3; TP53; TSC1
hsa-miR-98|SREBF1	CACNA1E; COL1A1; INSR; LMX1A; NTRK3; RPS6KA3; TNFRSF1B
hsa-miR-98|SREBF2	CACNA1E; EPHA4; NTRK3; RB1; RPS6KA3; TNFRSF1B
hsa-miR-98|TCF3	EPHA4; INSR; LMX1A; NRAS; TNFRSF1B
hsa-miR-98|TCF4	EPHA4; INSR; LMX1A; NRAS; TNFRSF1B
hsa-miR-98|TCF7	CACNA1E; MYCN; NTRK3; RPS6KA3; STEAP3; TNFRSF1B; TP53
hsa-miR-98|TCF7L2	MYCN; NTRK3
hsa-miR-99b|SMAD3	PI15
hsa-miR-99b|TCF3	PI15
hsa-miR-99b|TCF4	PI15
hsa-miR-9|AHR	FOXO3; LMX1A
hsa-miR-9|ASCL1	LAMP1; LMX1A
hsa-miR-9|ATF2	BCL11A; FOXO3; FURIN; LAMP1; PLAG1; TGFBR2; TSC1
hsa-miR-9|ATF3	BCL11A; FOXO3; FURIN; LAMP1; PLAG1; TGFBR2; TSC1
hsa-miR-9|ATF4	BCL11A; FOXO3; FURIN; LAMP1; PLAG1; TGFBR2; TSC1
hsa-miR-9|ATF5	BCL11A; ELAVL2; FOXO3; FURIN; LAMP1; PLAG1
hsa-miR-9|CREB1	BCL11A; FOXO3; FURIN; LAMP1; PLAG1; TGFBR2; TSC1
hsa-miR-9|ELK1	BCL11A; C18orf25; CACNA1E; DLGAP2; ELAVL2; FOXO3; PTCH1
hsa-miR-9|EP300	C18orf25; PTCH1
hsa-miR-9|ESR1	LAMP1; NOTCH2
hsa-miR-9|ETV4	CACNA1E; DYNC1LI2; ELAVL2; EPHA7
hsa-miR-9|GATA1	ALPL; C18orf25; CACNA1E; CSGALNACT1; EPHA7; PRKCA; TSC1
hsa-miR-9|GATA2	ALPL; CACNA1E; CSGALNACT1; EPHA7
hsa-miR-9|GATA3	ALPL; EPHA7
hsa-miR-9|HMGA1	ALPL; CACNA1E; CNTFR; EPHA7; TGFBR2
hsa-miR-9|JUN	ELAVL2; FOXO3; TGFBR2
hsa-miR-9|MAFB	ALPL; CSGALNACT1; ELAVL2; FOXO3; PHLDB1; PRKCA
hsa-miR-9|MYF6	LAMP1; LMX1A
hsa-miR-9|MYOD1	LAMP1; LMX1A
hsa-miR-9|MYOG	LAMP1; LMX1A
hsa-miR-9|MZF1	ALPL; CACNA1E; CNTFR; ELAVL2; LMX1A; NOTCH2; PHLDB1; PTCH1; TSC1
hsa-miR-9|NEUROD1	CSGALNACT1; DYNC1LI2; ELAVL2; PHLDB1; TGFBR2; TSC1
hsa-miR-9|NKX2-5	BCL11A; CSGALNACT1; DYNC1LI2; ELAVL2; FOXO3; LMX1A
hsa-miR-9|NR3C1	ELAVL2; EPHA7
hsa-miR-9|POU2F1	BCL11A; ELAVL2; PRKCA
hsa-miR-9|POU3F2	BCL11A; CSGALNACT1; LAMP1; PRKCA
hsa-miR-9|SOX10	BCL11A; CACNA1E; DYNC1LI2; FOXO3; PHLDB1; TSC1
hsa-miR-9|SP1	ALPL; BCL11A; CACNA1E; CNTFR; EPHA7; FOXO3; FURIN; LAMP1; LMX1A; NOTCH2; PTCH1
hsa-miR-9|SREBF1	BCL11A; CACNA1E; CSGALNACT1; LAMP1; LMX1A; TGFBR2
hsa-miR-9|TBX5	CACNA1E; DLGAP2; FOXO3; FURIN; TSC1
hsa-miR-9|TCF12	LAMP1; LMX1A
hsa-miR-9|TCF3	FOXO3; LAMP1; LMX1A
hsa-miR-9|TCF4	FOXO3; LAMP1; LMX1A
hsa-miR-9|TFAP2A	ALPL; DLGAP2; DYNC1LI2; LAMP1; PTCH1
hsa-miR-9|WT1	BCL11A; DYNC1LI2; FOXO3
hsa-miR-9|ZBTB7A	ALPL; BCL11A; PTCH1; TGFBR2
hsa-miR-9|ZEB1	LMX1A; PTCH1

## Sheet: miRNA-FFLs
Merged 3-node FFLs: miRNA-FFLs
FFL ID	GBM-related genes
hsa-let-7a|ELF4	CACNA1E
hsa-let-7a|GTF2I	COL1A1; RPS6KA3
hsa-let-7a|HMGA1	CACNA1E; NRAS; NTRK3; STEAP3; TP53
hsa-let-7a|POU2F2	NRAS
hsa-let-7a|TBX5	CACNA1E; INSR; KIAA1467; NRAS; STEAP3; TNFRSF1B; TSC1
hsa-let-7c|ELF4	CACNA1E
hsa-let-7c|GTF2I	COL1A1; RPS6KA3
hsa-let-7c|HMGA1	CACNA1E; NRAS; NTRK3; STEAP3; TP53
hsa-let-7c|POU2F2	NRAS
hsa-let-7c|TBX5	CACNA1E; INSR; KIAA1467; NRAS; STEAP3; TNFRSF1B; TSC1
hsa-let-7e|ELF4	CACNA1E
hsa-let-7e|HMGA1	CACNA1E; NRAS; NTRK3; STEAP3; TP53
hsa-let-7e|POU2F2	NRAS
hsa-let-7e|TBX5	CACNA1E; INSR; KIAA1467; NRAS; STEAP3; TNFRSF1B; TSC1
hsa-let-7f|ELF4	CACNA1E
hsa-let-7f|GTF2I	COL1A1; RPS6KA3
hsa-let-7f|HMGA1	CACNA1E; NRAS; NTRK3; STEAP3; TP53
hsa-let-7f|POU2F2	NRAS
hsa-let-7f|TBX5	CACNA1E; INSR; KIAA1467; NRAS; STEAP3; TNFRSF1B; TSC1
hsa-let-7g|ELF4	CACNA1E
hsa-let-7g|GTF2I	COL1A1; RPS6KA3
hsa-let-7g|HMGA1	CACNA1E; NRAS; NTRK3; STEAP3; TP53
hsa-let-7g|POU2F2	NRAS
hsa-let-7g|TBX5	CACNA1E; INSR; KIAA1467; NRAS; STEAP3; TNFRSF1B; TSC1
hsa-let-7i|ELF4	CACNA1E
hsa-let-7i|GTF2I	COL1A1; RPS6KA3
hsa-let-7i|HMGA1	CACNA1E; NRAS; NTRK3; STEAP3; TP53
hsa-let-7i|POU2F2	NRAS
hsa-let-7i|TBX5	CACNA1E; INSR; KIAA1467; NRAS; STEAP3; TNFRSF1B; TSC1
hsa-miR-101|ETS1	ADAMTSL3; PIK3C2B
hsa-miR-101|FOXO1	PTCH1
hsa-miR-101|ZIC1	PTCH1
hsa-miR-103|ESR1	NOTCH2
hsa-miR-103|HMGA1	BAI3; SIPA1L2; SPTBN1
hsa-miR-106b|EGR3	CYLD; EPHA7; MARK4; NTRK3; PTEN; SLC9A2; VAV2
hsa-miR-106b|HIF1A	RB1; SLC9A2; VAV2; WEE1
hsa-miR-106b|STAT3	PDGFRA; SLC9A2
hsa-miR-106b|TCF4	CYLD; EPHA4; ERBB3; SLC9A2; SPTBN1
hsa-miR-107|ESR1	NOTCH2
hsa-miR-107|HMGA1	BAI3; SIPA1L2; SPTBN1
hsa-miR-10a|SMAD2	ELAVL2
hsa-miR-124|E2F5	PIM1
hsa-miR-124|EGR1	BCL11A; KLF4; QSER1; SLC9A2
hsa-miR-124|EGR2	BCL11A; KLF4; QSER1; SLC9A2
hsa-miR-124|ETS1	PTPN11; STEAP3
hsa-miR-124|IRF1	LRRC7; ROR2
hsa-miR-124|NR3C1	LRRC7; ROR2
hsa-miR-124|RFX1	KLF4; RIMBP2
hsa-miR-124|SP1	BCL11A; FURIN; KLF4; PIM1; PTPN11; QSER1; SLC9A2
hsa-miR-124|SP2	ANXA7; BCL11A; FURIN; KLF4; PIM1; PTPN11; QSER1; SLC9A2
hsa-miR-124|SP3	BCL11A; FURIN; KLF4; PIM1; PTPN11; QSER1; SLC9A2
hsa-miR-124|STAT3	NRP1; SLC9A2
hsa-miR-124|TCF3	SLC9A2; STAT3
hsa-miR-124|TEAD1	FURIN; NRP1; PHLDB1; PTPN11; RIMBP2; SMAD4; STAT3
hsa-miR-124|TFAP4	JAG1; KLF4
hsa-miR-124|ZNF148	SLC9A2
hsa-miR-125a-5p|ETS1	ABCC4; FGFR1
hsa-miR-125a-5p|MAF	ZSWIM4
hsa-miR-125a-5p|MTF1	BCL2
hsa-miR-125a-5p|STAT3	KIAA1467
hsa-miR-125a-5p|ZNF148	BCL2
hsa-miR-125b|ETS1	ABCC4; FGFR1
hsa-miR-125b|MAF	ZSWIM4
hsa-miR-125b|MTF1	BCL2
hsa-miR-125b|SMAD2	ZSWIM4
hsa-miR-125b|SMAD4	ZSWIM4
hsa-miR-125b|STAT3	KIAA1467
hsa-miR-125b|ZBTB7A	BCL2; ZSWIM4
hsa-miR-125b|ZNF148	BCL2
hsa-miR-128|FOXO1	INSR; PDGFRA; PTCH1; SPTBN1
hsa-miR-128|FOXO4	INSR; SPTBN1
hsa-miR-128|GATA2	PDGFRA; SPTBN1
hsa-miR-128|SP1	FOXO4; FURIN; KLF4; MN1; NTRK3; PTCH1; RPN1
hsa-miR-128|SP2	FOXO4; FURIN; KLF4; MN1; NTRK3; PIK3R1; PTCH1; RPN1; SOX11
hsa-miR-128|SP4	FOXO4; FURIN; KLF4; MN1; NTRK3; PTCH1; RPN1
hsa-miR-128|TBP	PTCH1
hsa-miR-128|TCF4	INSR; SPTBN1
hsa-miR-128|TEAD1	FOXO4; FURIN; MN1; PIK3R1; PTCH1; SPTBN1
hsa-miR-129-5p|ARNT	SOX11
hsa-miR-129-5p|EP300	ARNT; SOX11
hsa-miR-129-5p|STAT5B	COL1A1
hsa-miR-130a|EGR3	CYLD; EPHA7; PTEN; QSER1; SLC9A2; TRIM3; VAV2
hsa-miR-130a|HOXA5	CAST; QSER1; SLC9A2
hsa-miR-130a|MAFG	ERBB3
hsa-miR-130a|POU3F2	CAST; CYLD; KIT; SLC9A2
hsa-miR-130a|SMAD4	BAI3; NRP1; SIPA1L2; SLC2A1
hsa-miR-130a|SP1	BAI3; CYLD; EPHA7; ERBB3; LRP2; PTEN; QSER1; RPS6KA3; SLC2A1; SLC9A2; TNFRSF1B; TRIM3; VAV2
hsa-miR-130a|TCF4	CYLD; ERBB3; KIT; SLC9A2; TNFRSF1B
hsa-miR-130a|ZEB1	ERBB3; RTN1
hsa-miR-130a|ZNF148	CAST; SLC9A2; TIMP2
hsa-miR-132|FOXO1	PTCH1; SLC12A6
hsa-miR-132|GATA2	SLC12A6
hsa-miR-132|SMAD2	SLC12A6; SLC2A1
hsa-miR-132|TCF7L2	SLC12A6
hsa-miR-133a|SP1	BCL11A; CYLD; FURIN; IDH1
hsa-miR-133a|TEAD1	DYNC1LI2; FURIN; IDH1; LAMB3; SPTBN1
hsa-miR-133b|SP1	BCL11A; CYLD; FURIN; IDH1
hsa-miR-133b|TEAD1	DYNC1LI2; FURIN; IDH1; LAMB3; SPTBN1
hsa-miR-135a|ARNT	KLF4; TBK1
hsa-miR-135a|ATF3	ARNT; BCL11A; KLF4; NF1; TGFBR2
hsa-miR-135a|ELK1	BCL11A; CACNA1E; DLGAP2; GATA3; NF1; SLC12A6; TBK1; ZSWIM4
hsa-miR-135a|SMAD4	CACNA1E; GATA3; SLC12A6; ZSWIM4
hsa-miR-135a|SP1	BCL11A; CACNA1E; KLF4; QSER1; SLC12A6; TBK1; ZSWIM4
hsa-miR-135a|SP3	BCL11A; CACNA1E; KLF4; QSER1; SLC12A6; TBK1; ZSWIM4
hsa-miR-137|MAX	CACNA1H; GOLGA3; KLF4; QSER1; RPS6KA3; SOX11; TRIM3
hsa-miR-137|TEAD1	ADAM15; IDH1; NRP1
hsa-miR-137|TFAP2A	CACNA1H; IDH1; MARK3; MYO1B; NOTCH1; QSER1; RPS6KA3; SLC12A6; SOX11; TRIM3
hsa-miR-137|TP63	GOLGA3
hsa-miR-137|USF2	GOLGA3; KLF4; SOX11; TRIM3
hsa-miR-137|ZBTB7A	BAI3; BCL11A; CACNA1H; MYO1B; PDGFRA; QSER1; SEMA3B; SLC12A6
hsa-miR-139-5p|TCF4	TOP1
hsa-miR-143|MAF	ERBB3
hsa-miR-143|ZNF148	BCL2
hsa-miR-144|CEBPA	EPHA7; MET
hsa-miR-144|FOSB	ELAVL2; MET; TGFBR2
hsa-miR-144|FOXO1	ELAVL2; PTCH1; SPTBN1
hsa-miR-144|SP4	ADAMTSL3; BCL11A; EPHA7; LRP2; MYCN; PTCH1; PTEN; QSER1
hsa-miR-145|MAF	ERBB3; KLF4
hsa-miR-145|MTF1	FLI1
hsa-miR-145|NFE2L1	ERBB3; FLI1; KLF4
hsa-miR-145|SP1	ERBB3; KLF4; MYCN; QSER1
hsa-miR-145|SP3	ERBB3; KLF4; MYCN; QSER1
hsa-miR-145|TCF4	ERBB3
hsa-miR-148a|CEBPG	MET
hsa-miR-148a|EGR3	BCL11A; PTEN; VAV2
hsa-miR-148a|FOSB	MET
hsa-miR-148a|MAF	MET
hsa-miR-148a|MAFG	MET
hsa-miR-148a|MITF	NRAS
hsa-miR-148a|POU3F2	BCL11A; CAST; KIT; NRAS
hsa-miR-148a|SMAD2	SLC2A1
hsa-miR-148a|SP1	BCL11A; NRAS; PTEN; SLC2A1; TNFRSF1B; VAV2
hsa-miR-148a|USF1	MET; NRAS; SOX11; VAV2
hsa-miR-148a|ZBTB7A	BCL11A; KIT; SLC2A1
hsa-miR-150|TEAD1	PIK3R1; RIMBP2
hsa-miR-152|CEBPG	MET
hsa-miR-152|EGR3	BCL11A; PTEN; VAV2
hsa-miR-152|MAF	MET
hsa-miR-152|MAFG	MET
hsa-miR-152|MITF	NRAS
hsa-miR-152|POU3F2	BCL11A; CAST; KIT; NRAS
hsa-miR-152|SMAD2	SLC2A1
hsa-miR-152|SP1	BCL11A; NRAS; PTEN; SLC2A1; TNFRSF1B; VAV2
hsa-miR-152|USF1	MET; NRAS; SOX11; VAV2
hsa-miR-153|FOXO1	ELAVL2; FOXO3; NF1; SPTBN1; ZFYVE9
hsa-miR-153|FOXO3	ELAVL2; FOXO3; SPTBN1; ZFYVE9
hsa-miR-155|ETS1	GOLGA3; SOCS1
hsa-miR-155|SMAD2	SLC12A6
hsa-miR-155|SOX10	PIK3R1; SLC12A6
hsa-miR-155|SP3	GOLGA3; SLC12A6; SOCS1
hsa-miR-15b|FOXO1	INSR; NF1; PTCH1; WEE1
hsa-miR-15b|HMGA1	CACNA1E; CYLD; PIM1; WEE1
hsa-miR-15b|NFIC	ADAMTSL3; CACNA1E; IRS1
hsa-miR-15b|PURA	ADAMTSL3; BCL2; CYLD; DLGAP2; IRS1; VAV2
hsa-miR-15b|SMAD3	CACNA1E; DLGAP2; RPS6KA3
hsa-miR-15b|TBP	CYLD; PTCH1
hsa-miR-15b|TCF3	CYLD; INSR
hsa-miR-15b|TEAD1	CACNA1E; FURIN; IRS1; KCTD8; NF1; NOTCH2; PTCH1
hsa-miR-16|FOXO1	INSR; NF1; PTCH1; WEE1
hsa-miR-16|HMGA1	CACNA1E; CYLD; PIM1; WEE1
hsa-miR-16|NFIC	ADAMTSL3; CACNA1E; IRS1
hsa-miR-16|PURA	ADAMTSL3; BCL2; CYLD; DLGAP2; IRS1; VAV2
hsa-miR-16|SMAD3	CACNA1E; DLGAP2; RPS6KA3
hsa-miR-16|TBP	CYLD; PTCH1
hsa-miR-16|TCF3	CYLD; INSR
hsa-miR-16|TEAD1	CACNA1E; FURIN; IRS1; KCTD8; NF1; NOTCH2; PTCH1
hsa-miR-17|EGR3	CYLD; EPHA7; MARK4; NTRK3; PTEN; SLC9A2; VAV2
hsa-miR-17|HIF1A	RB1; SLC9A2; VAV2; WEE1
hsa-miR-17|STAT3	PDGFRA; SLC9A2
hsa-miR-17|TCF4	CYLD; EPHA4; ERBB3; SLC9A2; SPTBN1
hsa-miR-17|ZBTB7A	CYLD; ERBB3; MARK4; NTRK3; PDGFRA; RB1
hsa-miR-181a|CEBPA	KLF6; PDGFRA
hsa-miR-181a|CREB1	ARNT2; BCL2; CTTNBP2NL; CYLD; FLT1; NPTXR; PLAG1
hsa-miR-181a|EGR1	CTTNBP2NL; CYLD; QSER1; SEMA3B; TRIM3
hsa-miR-181a|EGR3	ARNT2; CTTNBP2NL; CYLD; QSER1; SEMA3B; TRIM3
hsa-miR-181a|ETS1	CTTNBP2NL; FLT1; GRIA2
hsa-miR-181a|MTF1	BCL2
hsa-miR-181a|SMAD2	ATP8B1; ELAVL2; GRIA2; NRP1
hsa-miR-181a|SP1	BCL2; CTTNBP2NL; CYLD; FLT1; KLF6; LMX1A; NPTXR; QSER1; SEMA3B; TRIM3; TRRAP
hsa-miR-181a|TEAD1	CTTNBP2NL; GRIA2; KLF6; LMX1A; MSI1; NPTXR; NRP1
hsa-miR-181a|YY1	ARNT2; CNOT1; DLGAP2; MSI1; PDGFRA
hsa-miR-181b|CEBPA	KLF6; PDGFRA
hsa-miR-181b|CREB1	ARNT2; BCL2; CTTNBP2NL; CYLD; FLT1; NPTXR; PLAG1
hsa-miR-181b|EGR1	CTTNBP2NL; CYLD; QSER1; SEMA3B; TRIM3
hsa-miR-181b|EGR3	ARNT2; CTTNBP2NL; CYLD; QSER1; SEMA3B; TRIM3
hsa-miR-181b|ETS1	CTTNBP2NL; FLT1; GRIA2
hsa-miR-181b|MTF1	BCL2
hsa-miR-181b|SMAD2	ATP8B1; ELAVL2; GRIA2; NRP1
hsa-miR-181b|SP1	BCL2; CTTNBP2NL; CYLD; FLT1; KLF6; LMX1A; NPTXR; QSER1; SEMA3B; TRIM3; TRRAP
hsa-miR-181b|TEAD1	CTTNBP2NL; GRIA2; KLF6; LMX1A; MSI1; NPTXR; NRP1
hsa-miR-181b|YY1	ARNT2; CNOT1; DLGAP2; MSI1; PDGFRA
hsa-miR-181c|CEBPA	KLF6; PDGFRA
hsa-miR-181c|CREB1	ARNT2; BCL2; CTTNBP2NL; CYLD; FLT1; NPTXR; PLAG1
hsa-miR-181c|EGR1	CTTNBP2NL; CYLD; QSER1; SEMA3B; TRIM3
hsa-miR-181c|EGR3	ARNT2; CTTNBP2NL; CYLD; QSER1; SEMA3B; TRIM3
hsa-miR-181c|ETS1	CTTNBP2NL; FLT1; GRIA2
hsa-miR-181c|MTF1	BCL2
hsa-miR-181c|SP1	BAI3; BCL2; CTTNBP2NL; CYLD; FLT1; KLF6; LMX1A; NPTXR; QSER1; SEMA3B; TRIM3; TRRAP
hsa-miR-181c|YY1	ARNT2; CNOT1; DLGAP2; MSI1; PDGFRA
hsa-miR-182|AHR	BCL2; FOXO3; SOX11
hsa-miR-182|FOXO1	ELAVL2; FOXO3; NF1; PDGFRA
hsa-miR-182|FOXO3	ELAVL2; FOXO3
hsa-miR-182|NRF1	NF1
hsa-miR-183|FOXO1	PTCH1
hsa-miR-183|NFE2L1	PTCH1
hsa-miR-183|NR3C1	DCX
hsa-miR-183|NR4A2	EPHA4
hsa-miR-183|SMAD4	CACNA1E
hsa-miR-183|TEAD1	CACNA1E; PTCH1; RIMBP2; SMAD4
hsa-miR-195|FOXO1	INSR; NF1; PTCH1; WEE1
hsa-miR-195|HMGA1	CACNA1E; CYLD; PIM1; WEE1
hsa-miR-195|NFIC	ADAMTSL3; CACNA1E; IRS1
hsa-miR-195|PURA	ADAMTSL3; BCL2; CYLD; DLGAP2; IRS1; VAV2
hsa-miR-195|SMAD3	CACNA1E; DLGAP2; RPS6KA3
hsa-miR-195|TCF3	CYLD; INSR
hsa-miR-196a|HMGA1	COL3A1; NRAS; PDGFRA
hsa-miR-196b|HMGA1	COL3A1; NRAS; PDGFRA
hsa-miR-197|TCF4	CYLD; SLC9A2
hsa-miR-199b-5p|SP1	ADAMTSL3; EPHA7; MARK4; MN1; ZSWIM4
hsa-miR-1|FOSB	MET
hsa-miR-1|JUND	MET
hsa-miR-1|SMAD2	DGKG
hsa-miR-1|SMAD4	DGKG
hsa-miR-1|SP1	BCL11A; CTTNBP2NL
hsa-miR-1|SP2	BCL11A; CTTNBP2NL
hsa-miR-203|AHR	UPF2
hsa-miR-203|EGR3	CNTFR; ZSWIM4
hsa-miR-203|RUNX2	PRKCA
hsa-miR-203|SMAD3	CACNA1E; SPARC; ZSWIM4
hsa-miR-204|ESR1	LAMP1
hsa-miR-204|NR4A2	ROR2
hsa-miR-204|SMAD4	ATP8B1
hsa-miR-204|SP1	BCL11A; LAMP1; PTCH1; PTPN11
hsa-miR-204|TFAP2A	LAMP1; PTCH1; ROR2; SOX11
hsa-miR-218|PURA	BCL11A; GRIA2; KIT; QSER1; RIMBP2; SOX11; TAOK3; TRRAP
hsa-miR-218|SP1	ABCC4; BCL11A; QSER1; RPS6KA3; TRRAP
hsa-miR-219-5p|GATA2	GPR61; SPTBN1
hsa-miR-21|EGR3	CNTFR
hsa-miR-221|ETS1	SOCS1; WEE1
hsa-miR-221|FOXO3	FOXO3
hsa-miR-221|SOX10	FOXO3; SOX11; TIMP2
hsa-miR-221|TCF3	FOXO3; SEMA3B
hsa-miR-221|TCF4	FOXO3; SEMA3B
hsa-miR-221|TFAP2A	SOCS1; SOX11; TIMP2
hsa-miR-222|ETS1	SOCS1; WEE1
hsa-miR-222|FOXO3	FOXO3
hsa-miR-222|TCF3	FOXO3; SEMA3B
hsa-miR-222|TCF4	FOXO3; SEMA3B
hsa-miR-222|TFAP2A	SOCS1; SOX11; TIMP2
hsa-miR-223|PURA	SOX11
hsa-miR-223|SP1	BAI3
hsa-miR-23a|ARNT	SOX11
hsa-miR-23a|EGR3	ARNT2; CTTNBP2NL; PTEN
hsa-miR-23a|TEAD1	CTTNBP2NL; MSI1; PTPN11; ZEB1
hsa-miR-23b|ARNT	SOX11
hsa-miR-23b|EGR3	ARNT2; CTTNBP2NL; PTEN
hsa-miR-23b|TEAD1	CTTNBP2NL; MSI1; PTPN11; ZEB1
hsa-miR-24|NR5A1	SYP
hsa-miR-24|SP1	ERBB3; FURIN; MARK4; PIM1; SLC12A6; SMG6; SYP
hsa-miR-24|TCF7	LAMB3; PDGFRA; PDGFRB; PIM1; PLAG1; SLC12A6
hsa-miR-25|HNF1B	NOTCH1
hsa-miR-25|NRF1	NF1
hsa-miR-25|RFX1	RIMBP2
hsa-miR-25|SP1	BAI3; CACNA1H; MYO1B; NOTCH1; QSER1; SLC9A2
hsa-miR-25|TCF4	AXL; SLC9A2
hsa-miR-25|TEAD1	AXL; NF1; RIMBP2; SNX13
hsa-miR-25|TFAP2A	CACNA1H; DLGAP2; MYO1B; NF1; NOTCH1; QSER1; SLC9A2
hsa-miR-25|USF2	RIMBP2; SLC9A2
hsa-miR-25|ZNF148	SLC9A2
hsa-miR-26a|CEBPG	EPHA7; PDGFRA
hsa-miR-26a|GATA4	EPHA7; PDGFRA; RTN1
hsa-miR-26a|LEF1	SMAD4
hsa-miR-26a|PURA	BCL11A; PTEN; SLC9A2
hsa-miR-26a|SMAD1	BCL11A; ELAVL2; EPHA7; PDGFRA; RB1; SLC26A4; SLC9A2
hsa-miR-26a|SMAD4	ELAVL2; SLC26A4
hsa-miR-26a|TFAP2A	RB1; RTN1; SLC9A2
hsa-miR-26a|ZNF148	SLC9A2
hsa-miR-26b|CEBPG	EPHA7; PDGFRA
hsa-miR-26b|GATA4	EPHA7; PDGFRA; RTN1
hsa-miR-26b|LEF1	SMAD4
hsa-miR-26b|PURA	BCL11A; PTEN; SLC9A2
hsa-miR-26b|SMAD1	BCL11A; ELAVL2; EPHA7; PDGFRA; RB1; SLC26A4; SLC9A2
hsa-miR-26b|SMAD4	ELAVL2; SLC26A4
hsa-miR-26b|ZNF148	SLC9A2
hsa-miR-27a|ATF3	BCL11A; ID3; NF1; NPTXR; PLAG1
hsa-miR-27a|EGR3	AGRN; BCL11A; MN1; SEMA3B; VAV2
hsa-miR-27a|FOXO1	ELAVL2; NF1; PDGFRA; PTCH1
hsa-miR-27a|GATA3	NPTXR; PDGFRA; SEMA3B
hsa-miR-27a|GTF2I	IRS1; PTCH1
hsa-miR-27a|SMAD2	ELAVL2; GATA3; ID3
hsa-miR-27a|SP1	ADAMTSL3; BCL11A; IRS1; MN1; NPTXR; PTCH1; RPN1; SEMA3B; VAV2
hsa-miR-27a|TBP	PTCH1
hsa-miR-27a|TEAD1	GATA3; ID3; IRS1; MN1; NF1; NPTXR; PRKCD; PTCH1
hsa-miR-27b|ATF3	BCL11A; ID3; NF1; NPTXR; PLAG1
hsa-miR-27b|EGR3	AGRN; BCL11A; MN1; SEMA3B; VAV2
hsa-miR-27b|FOXO1	ELAVL2; NF1; PDGFRA; PTCH1
hsa-miR-27b|GATA3	NPTXR; PDGFRA; SEMA3B
hsa-miR-27b|GTF2I	IRS1; PTCH1
hsa-miR-27b|SMAD2	ELAVL2; GATA3; ID3
hsa-miR-27b|SP1	ADAMTSL3; BCL11A; IRS1; MN1; NPTXR; PTCH1; RPN1; SEMA3B; VAV2
hsa-miR-27b|TBP	PTCH1
hsa-miR-27b|TEAD1	GATA3; ID3; IRS1; MN1; NF1; NPTXR; PRKCD; PTCH1
hsa-miR-29b|ARNT	FOXO3; KLF4; LMX1A; MARK3
hsa-miR-29b|ETV4	COL1A1; PDGFRB; PIK3R1
hsa-miR-29b|FOS	KLF4; PDGFRB; PI15
hsa-miR-29b|FOXO3	FOXO3; SPTBN1
hsa-miR-29b|MAFG	KLF4; PDGFRB
hsa-miR-29b|NFATC4	DCX; DLGAP2
hsa-miR-29b|SP1	FOXO3; KLF4; LMX1A; NOTCH2; RPS6KA3
hsa-miR-29b|YY1	ARNT; DLGAP2; FOXO3; MARK3; RPS6KA3; SPARC; SPTBN1
hsa-miR-29c|ARNT	FOXO3; KLF4; LMX1A; MARK3
hsa-miR-29c|ETV4	COL1A1; PDGFRB; PIK3R1
hsa-miR-29c|FOS	KLF4; PDGFRB; PI15
hsa-miR-29c|FOXO3	FOXO3; SPTBN1
hsa-miR-29c|MAFG	KLF4; PDGFRB
hsa-miR-29c|NFATC4	DCX; DLGAP2
hsa-miR-29c|SP1	FOXO3; KLF4; LMX1A; NOTCH2; RPS6KA3
hsa-miR-29c|YY1	ARNT; DLGAP2; FOXO3; MARK3; RPS6KA3; SPARC; SPTBN1
hsa-miR-30b|BCL6	DCX
hsa-miR-30b|FOXO3	FOXO3; KRAS
hsa-miR-30b|MAF	PDGFRB
hsa-miR-30b|MAFG	PDGFRB
hsa-miR-30b|NFYB	PDGFRB
hsa-miR-30b|NR3C1	DCX; LYST; PDGFRB
hsa-miR-30b|RUNX2	BCL2; PDGFRB
hsa-miR-30b|SMAD1	ATP8B1; BCL11A; DCX; NF1; SOX11; TIMP2; TSC1
hsa-miR-30b|SP4	BCL11A; FOXO3; NOTCH1; VAV2
hsa-miR-30b|TEAD1	FOXO3; IDH1; IRS1; NF1; PDGFRB; TIMP2
hsa-miR-30b|ZBTB7A	BCL11A; BCL2; IRS1; NF1
hsa-miR-30b|ZNF148	BCL2; TIMP2
hsa-miR-30c|BCL6	DCX
hsa-miR-30c|FOXO3	FOXO3; KRAS
hsa-miR-30c|MAF	PDGFRB
hsa-miR-30c|MAFG	PDGFRB
hsa-miR-30c|NFYB	PDGFRB
hsa-miR-30c|NR3C1	DCX; LYST; PDGFRB
hsa-miR-30c|RUNX2	BCL2; PDGFRB
hsa-miR-30c|SMAD1	ATP8B1; BCL11A; DCX; NF1; SOX11; TIMP2; TSC1
hsa-miR-30c|SP4	BCL11A; FOXO3; NOTCH1; VAV2
hsa-miR-30c|TEAD1	FOXO3; IDH1; IRS1; NF1; PDGFRB; TIMP2
hsa-miR-30c|ZBTB7A	BCL11A; BCL2; IRS1; NF1
hsa-miR-30c|ZNF148	BCL2; TIMP2
hsa-miR-30d|BCL6	DCX
hsa-miR-30d|MAF	PDGFRB
hsa-miR-30d|MAFG	PDGFRB
hsa-miR-30d|NFYB	PDGFRB
hsa-miR-30d|NR3C1	DCX; LYST; PDGFRB
hsa-miR-30d|RUNX2	BCL2; PDGFRB
hsa-miR-30d|SP4	BCL11A; FOXO3; NOTCH1; VAV2
hsa-miR-30d|ZNF148	BCL2; TIMP2
hsa-miR-30e|BCL6	DCX
hsa-miR-30e|FOXO3	FOXO3; KRAS
hsa-miR-30e|MAFG	PDGFRB
hsa-miR-30e|NFYB	PDGFRB
hsa-miR-30e|RUNX2	BCL2; PDGFRB
hsa-miR-30e|SP4	BCL11A; FOXO3; NOTCH1; VAV2
hsa-miR-30e|TEAD1	FOXO3; IDH1; NF1; PDGFRB; TIMP2
hsa-miR-30e|ZNF148	BCL2; TIMP2
hsa-miR-330-5p|PAX8	NPTXR
hsa-miR-340|AHR	LMX1A; NOTCH1; SOX11
hsa-miR-340|EGR3	BCL11A; CYLD; QSER1
hsa-miR-340|MAF	ELAVL2; GRIA2; MET; TRMT5
hsa-miR-340|MAFG	MET
hsa-miR-340|NFKB1	CYLD; DCX
hsa-miR-340|NFYB	FOXO4
hsa-miR-340|NR3C1	DCX; ELAVL2; SIPA1L2
hsa-miR-340|SMAD4	BAI3; ELAVL2; GRIA2; ID3; SIPA1L2; SLC2A1
hsa-miR-340|SREBF1	BCL11A; CYLD; LMX1A; NOTCH1; RPS6KA3
hsa-miR-340|STAT5B	TRMT5
hsa-miR-340|TBX5	BAI3; DCX; DLGAP2; MYO1B; NOTCH1; RIMBP2; SIPA1L2; TSC1
hsa-miR-340|TCF3	CYLD; FOXO4; KIT; LMX1A; PI15; SIPA1L2
hsa-miR-340|TCF4	CYLD; KIT; LMX1A; PI15
hsa-miR-340|TEAD1	FOXO4; GRIA2; ID3; LMX1A; PI15; PTCH1; RIMBP2; SIPA1L2; SMAD4; TRMT5; ZNF384
hsa-miR-340|YY1	BCL11A; DLGAP2; ID3; MYO1B; PTCH1; RIMBP2; RPS6KA3; SLC2A1; TSC1
hsa-miR-340|ZNF148	CAST; FOXO4
hsa-miR-34a|FOSB	MET
hsa-miR-34a|FOSL1	MET
hsa-miR-34a|NFE2L1	JAG1; MET
hsa-miR-34a|SMAD4	CACNA1E
hsa-miR-34a|YY1	PDGFRA; TCF12
hsa-miR-34c-5p|FOSB	MET
hsa-miR-34c-5p|FOSL1	MET
hsa-miR-34c-5p|NFE2L1	JAG1; MET
hsa-miR-34c-5p|SMAD4	CACNA1E
hsa-miR-34c-5p|USF1	MET
hsa-miR-34c-5p|YY1	PDGFRA; TCF12
hsa-miR-370|FOSB	TGFBR2
hsa-miR-370|FOXO3	FOXO3
hsa-miR-375|TEAD1	NOTCH2; SYP
hsa-miR-376a|ZBTB7A	BCL11A
hsa-miR-383|FOS	ELAVL2
hsa-miR-486-5p|SMAD2	ELAVL2; GRIA2
hsa-miR-495|ETS1	CSNK1E; HSP90AA1; NOTCH1; RPS6KA3
hsa-miR-495|FOXO1	FOXO3; PTCH1
hsa-miR-495|FOXO3	FOXO3; PTCH1
hsa-miR-495|PURA	BCL11A; CSNK1E; CYLD; DLGAP2; FOXO3; IRS1; NOTCH1; PTEN
hsa-miR-495|SP2	BCL11A; CYLD; FOXO3; HSP90AA1; NOTCH1; NPTXR; PIK3R1; PTCH1; PTEN; RPS6KA3; SLC26A4; TNFRSF1B
hsa-miR-495|ZNF148	TIMP2
hsa-miR-503|NFE2L1	EPHA7
hsa-miR-503|PURA	BCL2; DLGAP2
hsa-miR-519d|EGR3	CYLD; EPHA7; MARK4; NTRK3; PTEN; SLC9A2; VAV2
hsa-miR-519d|HIF1A	RB1; SLC9A2; VAV2; WEE1
hsa-miR-519d|STAT3	PDGFRA; SLC9A2
hsa-miR-519d|TCF4	CYLD; ERBB3; SLC9A2; SPTBN1
hsa-miR-519d|ZBTB7A	CYLD; ERBB3; MARK4; MYCN; NTRK3; PDGFRA; RB1
hsa-miR-7|SP1	SMG6; TNK2
hsa-miR-7|TCF4	COL1A2
hsa-miR-92b|HNF1B	NOTCH1
hsa-miR-92b|NRF1	NF1
hsa-miR-92b|RFX1	RIMBP2
hsa-miR-92b|SP1	BAI3; CACNA1H; MYO1B; NOTCH1; QSER1; SLC9A2
hsa-miR-92b|TCF4	AXL; SLC9A2
hsa-miR-92b|TEAD1	AXL; NF1; RIMBP2; SNX13
hsa-miR-92b|TFAP2A	CACNA1H; DLGAP2; MYO1B; NF1; NOTCH1; QSER1; SLC9A2
hsa-miR-92b|USF2	RIMBP2; SLC9A2
hsa-miR-92b|ZNF148	SLC9A2
hsa-miR-93|EGR3	CYLD; EPHA7; MARK4; NTRK3; PTEN; SLC9A2; VAV2
hsa-miR-93|HIF1A	RB1; SLC9A2; VAV2; WEE1
hsa-miR-93|NR4A2	DYNC1LI2; EPHA4; RB1; SV2B; TIMP2; WEE1
hsa-miR-93|STAT3	PDGFRA; SLC9A2
hsa-miR-93|TCF4	CYLD; EPHA4; ERBB3; SLC9A2; SPTBN1
hsa-miR-98|ELF4	CACNA1E
hsa-miR-98|GTF2I	COL1A1; RPS6KA3
hsa-miR-98|HMGA1	CACNA1E; NRAS; NTRK3; STEAP3; TP53
hsa-miR-98|POU2F2	NRAS
hsa-miR-98|TBX5	CACNA1E; INSR; KIAA1467; NRAS; STEAP3; TNFRSF1B; TSC1
hsa-miR-9|EGR3	ALPL; BCL11A; CNTFR; EPHA7; FOXO3
hsa-miR-9|ETS1	CACNA1E; CNTFR; TSC1
hsa-miR-9|FOXO1	ELAVL2; FOXO3; PTCH1
hsa-miR-9|FOXO3	ELAVL2; FOXO3; PTCH1
hsa-miR-9|SMAD4	ALPL; CACNA1E; ELAVL2; NRP1
hsa-miR-9|TEAD1	CACNA1E; CNTFR; DYNC1LI2; FOXO3; FURIN; LAMP1; LMX1A; NOTCH2; NRP1; PHLDB1; PTCH1; SMAD4

## Sheet: Composite-FFLs
Merged 3-node FFLs: composite-FFLs
FFL ID	GBM-related genes
hsa-let-7e|GTF2I	COL1A1; RPS6KA3
hsa-miR-106b|ZBTB7A	CYLD; ERBB3; MARK4; NTRK3; PDGFRA; RB1
hsa-miR-10b|SMAD2	ELAVL2
hsa-miR-125a-5p|SMAD2	ZSWIM4
hsa-miR-125a-5p|SMAD4	ZSWIM4
hsa-miR-125a-5p|ZBTB7A	BCL2; ZSWIM4
hsa-miR-137|SP1	ADAM15; BAI3; BCL11A; BCL2L13; CACNA1H; GOLGA3; IDH1; KLF4; MYO1B; NOTCH1; QSER1; RPS6KA3; SEMA3B; SLC12A6; TRIM3
hsa-miR-138|TEAD1	MSI1; PTPN11; TCF12; UPF2
hsa-miR-145|FLI1	FLI1
hsa-miR-152|FOSB	MET
hsa-miR-152|ZBTB7A	BCL11A; KIT; SLC2A1
hsa-miR-181c|SMAD2	ATP8B1; BAI3; ELAVL2; GRIA2; NRP1
hsa-miR-181c|TEAD1	CTTNBP2NL; GRIA2; KLF6; LMX1A; MSI1; NPTXR; NRP1
hsa-miR-182|TEAD1	FOXO3; NF1; PHLDB1; PIK3R1
hsa-miR-183|TCF4	EPHA4
hsa-miR-195|TBP	CYLD; PTCH1
hsa-miR-195|TEAD1	CACNA1E; FURIN; IRS1; KCTD8; NF1; NOTCH2; PTCH1
hsa-miR-203|SP1	CACNA1E; CNTFR; UPF2; ZSWIM4
hsa-miR-203|SP4	CACNA1E; CNTFR; UPF2; ZSWIM4
hsa-miR-204|RUNX2	PDGFRB; PTCH1
hsa-miR-218|RUNX2	RIMBP2
hsa-miR-218|TEAD1	GRIA2; RIMBP2; SV2B; TAOK3
hsa-miR-222|SOX10	FOXO3; SOX11; TIMP2
hsa-miR-26b|TFAP2A	RB1; RTN1; SLC9A2
hsa-miR-30d|FOXO3	FOXO3; KRAS
hsa-miR-30d|SMAD1	ATP8B1; BCL11A; DCX; NF1; SOX11; TIMP2; TSC1
hsa-miR-30d|TEAD1	FOXO3; IDH1; IRS1; NF1; PDGFRB; TIMP2
hsa-miR-30e|MAF	PDGFRB
hsa-miR-30e|NR3C1	DCX; LYST; PDGFRB
hsa-miR-30e|SMAD1	ATP8B1; BCL11A; DCX; NF1; SOX11; TIMP2; TSC1
hsa-miR-346|TEAD1	SMAD4
hsa-miR-375|AHR	KLF4
hsa-miR-375|JUND	ELAVL2; KLF4
hsa-miR-375|SP1	CDKN2B; KLF4; NOTCH2; SYP
hsa-miR-495|TCF4	CYLD; FOXO3; HSP90AA1; NPTXR; SLC26A4; TNFRSF1B
hsa-miR-495|TEAD1	FOXO3; IRS1; LRRK1; MSI1; NPTXR; ODZ2; PIK3R1; PTCH1; SPARC; TIMP2; TNFRSF1B
hsa-miR-495|TFAP4	RPS6KA3; TIMP2; TNFRSF1B
hsa-miR-93|ZBTB7A	CYLD; ERBB3; MARK4; NTRK3; PDGFRA; RB1
hsa-miR-9|PURA	ALPL; BCL11A; DLGAP2; FOXO3; LMX1A; NRP1
hsa-miR-9|TCF7	CACNA1E; DLGAP2; ELAVL2; NOTCH2; NRP1; PLAG1; PTCH1; SMAD4
