# Supplementary material for: Uncovering MicroRNA and Transcription Factor Mediated Regulatory Networks in Glioblastoma
Source: PLoS Comput Biol. 2012 Jul 19;8(7):e1002488. doi: 10.1371/journal.pcbi.1002488 (PMC3400583; doi:10.1371/journal.pcbi.1002488)
Supplement: Table S4 — Pathways significantly enriched for 153 GBM-related genes in 3-node FFLs. (DOC) [file pcbi.1002488.s014.doc]

**Table S4.** Pathways significantly enriched for 153 GBM-related genes in 3-node FFLs.

| **Ranking** | **Pathway** | **Adjusted *P*-valuea** |
| --- | --- | --- |
| 1 | Pathways in cancerb | 9.27 × 10-25 |
| 2 | Focal adhesionb | 3.06 × 10-16 |
| 3 | Prostate cancerb | 4.01 × 10-15 |
| 4 | Melanomab | 1.09 × 10-14 |
| 5 | Neurotrophin signaling pathwayb | 1.63 × 10-13 |
| 6 | Gliomab | 1.63 × 10-13 |
| 7 | MAPK signaling pathwayb | 1.85 × 10-13 |
| 8 | Colorectal cancerb | 1.78 × 10-12 |
| 9 | Non-small cell lung cancer | 6.40 × 10-11 |
| 10 | Renal cell carcinomab | 4.99 × 10-10 |
| 11 | Pancreatic cancer | 5.69 × 10-10 |
| 12 | Chronic myeloid leukemiab | 7.31 × 10-10 |
| 13 | Endometrial cancer | 1.64 × 10-9 |
| 14 | Small cell lung cancer | 1.64 × 10-9 |
| 15 | Regulation of actin cytoskeleton | 1.16 × 10-8 |
| 16 | Fc epsilon RI signaling pathway | 2.90 × 10-8 |
| 17 | Type II diabetes mellitus | 3.39 × 10-8 |
| 18 | ECM-receptor interaction | 3.95 × 10-8 |
| 19 | Acute myeloid leukemia | 1.36 × 10-7 |
| 20 | Adherens junction | 5.85 × 10-7 |
| 21 | Cell cycle | 6.16 × 10-7 |
| 22 | Axon guidanceb | 6.16 × 10-7 |
| 23 | Bladder cancer | 6.16 × 10-7 |
| 24 | Cytokine-cytokine receptor interactionb | 6.64 × 10-7 |
| 25 | Insulin signaling pathway | 8.33 × 10-7 |
| 26 | ErbB signaling pathway | 9.33 × 10-7 |
| 27 | Gap junction | 1.10 × 10-6 |
| 28 | Amyotrophic lateral sclerosis (ALS) | 1.66 × 10-6 |
| 29 | GnRH signaling pathway | 2.02 × 10-6 |
| 30 | Calcium signaling pathwayb | 4.00 × 10-6 |
| 31 | Adipocytokine signaling pathway | 4.85 × 10-6 |
| 32 | Endocytosis | 5.20 × 10-6 |
| 33 | p53 signaling pathway | 5.28 × 10-6 |
| 34 | Long-term potentiation | 5.35 × 10-6 |
| 35 | Chemokine signaling pathway | 5.35 × 10-6 |
| 36 | Phosphatidylinositol signaling system | 7.59 × 10-6 |
| 37 | VEGF signaling pathway | 7.59 × 10-6 |
| 38 | Natural killer cell mediated cytotoxicity | 9.05 × 10-6 |
| 39 | Progesterone-mediated oocyte maturation | 1.33 × 10-5 |
| 40 | TGF-beta signaling pathway | 1.36 × 10-5 |
| 41 | Jak-STAT signaling pathway | 1.69 × 10-5 |
| 42 | T cell receptor signaling pathway | 3.70 × 10-5 |
| 43 | Leukocyte transendothelial migration | 5.53 × 10-5 |
| 44 | Tight junction | 9.86 × 10-5 |

aAdjusted *P*-value was calculated by hypergeometric test following by Benjamini-Hochberg multiple testing correction; bPathway was enriched in 72 genes.
