# Supplementary material for: Uncovering MicroRNA and Transcription Factor Mediated Regulatory Networks in Glioblastoma
Source: PLoS Comput Biol. 2012 Jul 19;8(7):e1002488. doi: 10.1371/journal.pcbi.1002488 (PMC3400583; doi:10.1371/journal.pcbi.1002488)
Supplement: Table S5 — Merged 4-node FFLs including TF-FFLs, miRNA-FFLs and composite-FFLs. (XLS) [file pcbi.1002488.s015.xls]

## Sheet: TF-FFLs
Merged 4-node FFLs: TF-FFLs
Feedforward loop (FFL) ID	GBM-related gene-gene pairs
hsa-let-7e|ETV4	COL1A1-BAI3; NTRK3-BAI3; STEAP3-CAST; STEAP3-MEOX2; TNFRSF1B-A2M; TNFRSF1B-CAST; TNFRSF1B-ITGB2; TNFRSF1B-TCF12
hsa-let-7e|GATA1	COL4A2-COL3A1; NTRK3-ARNT2; STEAP3-CAST; STEAP3-LTF; TNFRSF1B-A2M; TNFRSF1B-CAST; TNFRSF1B-TCF12
hsa-let-7e|MAFB	STEAP3-CAST; STEAP3-GRIA2; TNFRSF1B-CAST; TNFRSF1B-MAN2B1
hsa-let-7e|MZF1	NTRK3-ARNT2; STEAP3-CAST; TNFRSF1B-CAST; TNFRSF1B-ITGB2
hsa-let-7e|SMAD1	COL1A1-BAI3; NTRK3-BAI3; NTRK3-NRP1; STEAP3-GRIA2; STEAP3-LTF; TNFRSF1B-A2M; TNFRSF1B-ITGB2; TNFRSF1B-MAN2B1
hsa-let-7e|SMAD3	COL1A1-BAI3; NTRK3-BAI3; NTRK3-NRP1; STEAP3-GRIA2; STEAP3-LTF; TNFRSF1B-ITGB2; TNFRSF1B-MAN2B1
hsa-let-7e|SMAD4	COL1A1-BAI3; NTRK3-BAI3; NTRK3-NRP1; STEAP3-GRIA2; STEAP3-LTF; TNFRSF1B-ITGB2; TNFRSF1B-MAN2B1
hsa-let-7e|SOX10	COL4A2-COL3A1; NTRK3-ARNT2; TNFRSF1B-ITGB2; TNFRSF1B-MAN2B1; TNFRSF1B-TCF12
hsa-let-7e|SREBF1	STEAP3-LTF; TNFRSF1B-MAN2B1; TNFRSF1B-TGFBR2
hsa-let-7e|TCF12	TNFRSF1B-ITGB2
hsa-let-7e|TFAP2A	NTRK3-ARNT2; STEAP3-CAST; TNFRSF1B-CAST
hsa-let-7e|WT1	STEAP3-GRIA2
hsa-let-7e|ZBTB7A	COL1A1-BAI3; NTRK3-BAI3; STEAP3-MEOX2; TNFRSF1B-TGFBR2
hsa-let-7e|ZFP161	COL1A1-BAI3; NTRK3-ARNT2; NTRK3-BAI3; TNFRSF1B-TGFBR2
hsa-let-7i|ELK1	STEAP3-CAST; STEAP3-GRIA2; TNFRSF1B-CAST; TNFRSF1B-ITGB2; TNFRSF1B-MAN2B1; TNFRSF1B-TCF12
hsa-let-7i|ETS1	STEAP3-CAST; STEAP3-GRIA2; TNFRSF1B-CAST; TNFRSF1B-ITGB2
hsa-let-7i|ETV4	COL1A1-BAI3; NTRK3-BAI3; STEAP3-CAST; STEAP3-MEOX2; TNFRSF1B-A2M; TNFRSF1B-CAST; TNFRSF1B-ITGB2; TNFRSF1B-TCF12
hsa-let-7i|GATA1	COL4A2-COL3A1; NTRK3-ARNT2; STEAP3-CAST; STEAP3-LTF; TNFRSF1B-A2M; TNFRSF1B-CAST; TNFRSF1B-TCF12
hsa-let-7i|GATA2	COL4A2-COL3A1; STEAP3-CAST; TNFRSF1B-CAST
hsa-let-7i|SMAD1	COL1A1-BAI3; NTRK3-BAI3; NTRK3-NRP1; STEAP3-GRIA2; STEAP3-LTF; TNFRSF1B-A2M; TNFRSF1B-ITGB2; TNFRSF1B-MAN2B1
hsa-let-7i|SP1	COL1A1-BAI3; NTRK3-BAI3
hsa-let-7i|SREBF2	NTRK3-NRP1; TNFRSF1B-TGFBR2
hsa-let-7i|TCF12	TNFRSF1B-ITGB2
hsa-let-7i|TEAD1	NTRK3-NRP1; STEAP3-GRIA2; STEAP3-LTF; STEAP3-MEOX2; TNFRSF1B-A2M; TNFRSF1B-MAN2B1; TNFRSF1B-TCF12
hsa-let-7i|TFAP2A	NTRK3-ARNT2; STEAP3-CAST; TNFRSF1B-CAST
hsa-let-7i|YY1	NTRK3-ARNT2; TNFRSF1B-TCF12
hsa-let-7i|ZFP161	COL1A1-BAI3; NTRK3-ARNT2; NTRK3-BAI3; TNFRSF1B-TGFBR2
hsa-miR-106b|ETS1	PDGFRA-ASPM
hsa-miR-106b|GATA1	NTRK3-ARNT2; PDGFRA-DCX; PIK3R1-ARNT2; PIK3R1-NTRK3; SV2B-RTN1
hsa-miR-106b|GATA2	PDGFRA-DCX; SV2B-RTN1
hsa-miR-106b|MAFB	PDGFRA-ASPM; PDGFRA-DCX; SV2B-RTN1
hsa-miR-106b|MZF1	NTRK3-ARNT2; PDGFRA-GNAI1; PIK3R1-ARNT2; PIK3R1-NTRK3; SV2B-RTN1
hsa-miR-106b|NEUROD1	SV2B-RTN1
hsa-miR-106b|NFE2L1	SV2B-RTN1
hsa-miR-106b|TBX5	NTRK3-ARNT2; NTRK3-BAI3; PDGFRA-DCX; PIK3R1-ARNT2; SV2B-RTN1
hsa-miR-106b|YY1	NTRK3-ARNT2; PIK3R1-ARNT2; SV2B-RTN1
hsa-miR-107|CEBPA	PIK3R1-NTRK3
hsa-miR-107|CEBPB	PIK3R1-NTRK3
hsa-miR-107|CEBPE	PIK3R1-NTRK3
hsa-miR-107|CEBPG	PIK3R1-NTRK3
hsa-miR-107|CREB1	PIK3R1-ARNT2
hsa-miR-107|GATA1	PIK3R1-ARNT2; PIK3R1-NTRK3
hsa-miR-107|MAF	LRP1B-GRIA2
hsa-miR-107|MAFB	LRP1B-GRIA2
hsa-miR-107|NR4A2	PIK3R1-ARNT2
hsa-miR-107|SMAD1	LRP1B-BAI3; LRP1B-GRIA2
hsa-miR-107|SMAD2	LRP1B-BAI3; LRP1B-GRIA2
hsa-miR-107|SMAD3	LRP1B-BAI3; LRP1B-GRIA2
hsa-miR-107|SMAD4	LRP1B-BAI3; LRP1B-GRIA2
hsa-miR-107|SOX10	PIK3R1-ARNT2
hsa-miR-107|TBX5	LRP1B-BAI3; PIK3R1-ARNT2
hsa-miR-107|TCF7	PIK3R1-NTRK3
hsa-miR-107|TCF7L2	PIK3R1-NTRK3
hsa-miR-107|TEAD1	LRP1B-GRIA2
hsa-miR-107|TFAP2A	PIK3R1-ARNT2
hsa-miR-10b|MZF1	TRIM2-PIK3R1
hsa-miR-10b|SMAD1	TRIM2-PIK3R1
hsa-miR-10b|TBX5	TRIM2-PIK3R1
hsa-miR-130a|CEBPA	CAST-ANXA1; KIT-ANXA1; KIT-CAST; MEOX2-ANXA1; NRP1-CAST; NRP1-COL3A1; SLC2A1-CAST; TNFRSF1B-A2M; TNFRSF1B-CAST
hsa-miR-130a|CEBPB	CAST-ANXA1; KIT-ANXA1; MEOX2-ANXA1; NRP1-COL3A1
hsa-miR-130a|CEBPE	CAST-ANXA1; KIT-ANXA1; MEOX2-ANXA1; NRP1-COL3A1
hsa-miR-130a|CEBPG	CAST-ANXA1; KIT-ANXA1; MEOX2-ANXA1; NRP1-COL3A1
hsa-miR-130a|ELK1	KIT-CAST; KIT-IQGAP1; LRP1B-GRIA2; NRP1-CAST; NRP1-IQGAP1; SLC2A1-CAST; TNFRSF1B-CAST; TNFRSF1B-ITGB2; TNFRSF1B-MAN2B1; TNFRSF1B-TCF12; ZEB1-GRIA2; ZEB1-NOTCH1; ZEB1-TCF12
hsa-miR-130a|ETS1	KIT-CAST; LRP1B-GRIA2; MEOX2-EGFR; MEOX2-IDH1; NRP1-CAST; PDGFRA-ASPM; SLC2A1-CAST; TNFRSF1B-CAST; TNFRSF1B-ITGB2; ZEB1-GRIA2; ZEB1-NOTCH1
hsa-miR-130a|MAFB	KIT-CAST; LRP1B-GRIA2; MEOX2-JAG1; NRP1-CAST; PDGFRA-ASPM; PDGFRA-DCX; SLC2A1-CAST; TNFRSF1B-CAST; TNFRSF1B-MAN2B1; ZEB1-GRIA2; ZEB1-JAG1
hsa-miR-130a|MZF1	KIT-CAST; NRP1-ARNT2; NRP1-CAST; NRP1-COL1A1; NRP1-COL1A2; NRP1-FN1; PDGFRA-GNAI1; SLC2A1-CAST; TNFRSF1B-CAST; TNFRSF1B-ITGB2; ZEB1-CTSH; ZEB1-NOTCH1; ZEB1-PROX1
hsa-miR-130a|NEUROD1	MEOX2-JAG1; MEOX2-LTF; NRP1-COL1A1; NRP1-KIT; TNFRSF1B-ITGB2; TNFRSF1B-MAN2B1; TNFRSF1B-TGFBR2; ZEB1-JAG1; ZEB1-NOTCH1; ZEB1-PROX1
hsa-miR-130a|POU2F1	KIT-CAST; LRP1B-GRIA2; NRP1-CAST; NRP1-KIT; PDGFRA-DCX; SLC2A1-CAST; TNFRSF1B-A2M; TNFRSF1B-CAST; ZEB1-GRIA2; ZEB1-NOTCH1
hsa-miR-130a|PURA	LRP1B-GRIA2; MEOX2-JAG1; MEOX2-LTF; NRP1-ARNT2; NRP1-COL1A1; NRP1-COL1A2; NRP1-KIT; TNFRSF1B-MAN2B1; ZEB1-GRIA2; ZEB1-JAG1; ZEB1-NOTCH1
hsa-miR-130a|TCF7	CAST-ANXA1; KIT-ANXA1; MEOX2-ANXA1; MEOX2-IDH1; MEOX2-JAG1; NRP1-COL1A2; NRP1-COL3A1; NRP1-FN1; PDGFRA-DCX; TNFRSF1B-A2M; TNFRSF1B-TCF12; ZEB1-JAG1; ZEB1-TCF12
hsa-miR-130a|TEAD1	CAST-ANXA1; KIT-ANXA1; LRP1B-GRIA2; MEOX2-ANXA1; MEOX2-IDH1; MEOX2-LTF; NRP1-COL1A2; TNFRSF1B-A2M; TNFRSF1B-MAN2B1; TNFRSF1B-TCF12; ZEB1-GRIA2; ZEB1-TCF12
hsa-miR-130a|WT1	LRP1B-GRIA2; NRP1-COL1A2; NRP1-KIT; ZEB1-GRIA2; ZEB1-NOTCH1
hsa-miR-132|ELK1	SLC2A1-CAST
hsa-miR-132|ETS1	SLC2A1-CAST
hsa-miR-132|GATA1	SLC2A1-CAST
hsa-miR-132|MAFB	SLC2A1-CAST
hsa-miR-133b|NKX2-5	EGFR-BAMBI
hsa-miR-137|CEBPA	NRP1-CAST; NRP1-COL3A1
hsa-miR-137|HMGA1	NRP1-COL3A1; PDGFRA-DCX
hsa-miR-137|MZF1	NOTCH1-ARNT2; NOTCH1-CTSH; NRP1-ARNT2; NRP1-CAST; NRP1-COL1A1; NRP1-COL1A2; NRP1-FN1; PDGFRA-GNAI1
hsa-miR-137|NEUROD1	NRP1-COL1A1; NRP1-KIT
hsa-miR-137|POU2F1	NRP1-CAST; NRP1-KIT; PDGFRA-DCX
hsa-miR-137|RORB	NRP1-COL1A2; PDGFRA-DCX
hsa-miR-137|SOX10	NOTCH1-ARNT2; NRP1-ARNT2; NRP1-COL1A1; NRP1-COL1A2; NRP1-COL3A1; NRP1-KIT
hsa-miR-137|SP2	NOTCH1-MGMT; NRP1-FN1; NRP1-IQGAP1
hsa-miR-137|SP3	NOTCH1-MGMT; NRP1-FN1; NRP1-IQGAP1
hsa-miR-137|SP4	NOTCH1-MGMT; NRP1-FN1; NRP1-IQGAP1
hsa-miR-137|SREBF2	NOTCH1-CTSH; NRP1-IQGAP1; NRP1-KIT; PDGFRA-ASPM
hsa-miR-137|TBX5	NOTCH1-ARNT2; NOTCH1-MGMT; NRP1-ARNT2; NRP1-COL1A2; PDGFRA-DCX
hsa-miR-137|TCF12	NRP1-COL1A2; NRP1-KIT
hsa-miR-137|TCF7	NRP1-COL1A2; NRP1-COL3A1; NRP1-FN1; PDGFRA-DCX
hsa-miR-138|GATA1	TCF12-STEAP3
hsa-miR-138|MYOG	TCF12-AURKB
hsa-miR-138|MZF1	TCF12-ITGB2; TCF12-NOTCH1
hsa-miR-138|NEUROD1	TCF12-ITGB2; TCF12-MEOX2; TCF12-NOTCH1; TCF12-STEAP3
hsa-miR-138|RUNX2	TCF12-ITGB2; TCF12-MEOX2; TCF12-STEAP3
hsa-miR-138|SOX10	TCF12-IDH1; TCF12-ITGB2; TCF12-STEAP3
hsa-miR-138|TBX5	TCF12-BAI3; TCF12-IDH1; TCF12-ITGB2; TCF12-MEOX2; TCF12-NOTCH1; TCF12-STEAP3
hsa-miR-139-5p|ARNT	TCF12-AURKB
hsa-miR-139-5p|HNF1B	TCF12-NOTCH1
hsa-miR-139-5p|MZF1	TCF12-ITGB2; TCF12-NOTCH1
hsa-miR-139-5p|RORB	TCF12-GRIA2
hsa-miR-139-5p|SMAD3	TCF12-BAI3; TCF12-GRIA2; TCF12-ITGB2
hsa-miR-139-5p|SREBF2	TCF12-ASPM; TCF12-NOTCH1
hsa-miR-139-5p|TBX5	TCF12-BAI3; TCF12-IDH1; TCF12-ITGB2; TCF12-MEOX2; TCF12-NOTCH1; TCF12-STEAP3
hsa-miR-139-5p|TCF7	TCF12-IDH1; TCF12-MEOX2; TCF12-STEAP3
hsa-miR-139-5p|TEAD1	TCF12-AURKB; TCF12-GRIA2; TCF12-IDH1; TCF12-MEOX2
hsa-miR-139-5p|ZBTB7A	TCF12-BAI3; TCF12-MEOX2; TCF12-STEAP3
hsa-miR-143|EP300	PDGFRA-ASPM
hsa-miR-143|ETS1	PDGFRA-ASPM
hsa-miR-143|MZF1	PDGFRA-GNAI1
hsa-miR-143|RORB	PDGFRA-DCX
hsa-miR-143|SREBF2	PDGFRA-ASPM
hsa-miR-144|CRX	TGFBR2-A2M; TGFBR2-CAST; TGFBR2-TCF12
hsa-miR-144|EP300	TGFBR2-A2M
hsa-miR-144|GATA1	TGFBR2-A2M; TGFBR2-CAST; TGFBR2-TCF12
hsa-miR-144|MAFB	TGFBR2-CAST
hsa-miR-144|NEUROD1	TGFBR2-AXL; TGFBR2-ITGB2
hsa-miR-144|PURA	TGFBR2-AXL; TGFBR2-NRP1
hsa-miR-144|SMAD1	TGFBR2-A2M; TGFBR2-ITGB2; TGFBR2-NRP1
hsa-miR-144|SMAD2	TGFBR2-ITGB2; TGFBR2-NRP1
hsa-miR-144|SMAD3	TGFBR2-ITGB2; TGFBR2-NRP1
hsa-miR-144|TCF7	TGFBR2-A2M; TGFBR2-NRP1; TGFBR2-TCF12
hsa-miR-144|TEAD1	TGFBR2-A2M; TGFBR2-AXL; TGFBR2-NRP1; TGFBR2-TCF12
hsa-miR-145|CRX	TRIM2-PIK3R1
hsa-miR-145|ETV4	TRIM2-PIK3R1
hsa-miR-145|MZF1	TRIM2-PIK3R1
hsa-miR-150|PURA	PIK3R1-ARNT2
hsa-miR-150|SOX10	PIK3R1-ARNT2
hsa-miR-150|TBX5	PIK3R1-ARNT2
hsa-miR-150|TCF7	PIK3R1-NTRK3
hsa-miR-150|TCF7L2	PIK3R1-NTRK3
hsa-miR-150|ZBTB7A	PIK3R1-NTRK3
hsa-miR-152|ELK1	KIT-CAST; KIT-IQGAP1; SLC2A1-CAST; TNFRSF1B-CAST; TNFRSF1B-ITGB2; TNFRSF1B-MAN2B1; TNFRSF1B-TCF12
hsa-miR-152|FOS	TNFRSF1B-TGFBR2
hsa-miR-152|FOSL1	TNFRSF1B-TGFBR2
hsa-miR-152|JUN	TNFRSF1B-TGFBR2
hsa-miR-152|JUNB	TNFRSF1B-TGFBR2
hsa-miR-152|JUND	TNFRSF1B-TGFBR2
hsa-miR-152|MAFB	KIT-CAST; SLC2A1-CAST; TNFRSF1B-CAST; TNFRSF1B-MAN2B1
hsa-miR-152|NEUROD1	TNFRSF1B-ITGB2; TNFRSF1B-MAN2B1; TNFRSF1B-TGFBR2
hsa-miR-152|SOX10	TNFRSF1B-ITGB2; TNFRSF1B-MAN2B1; TNFRSF1B-TCF12
hsa-miR-152|TBX5	CAST-ANXA1; CAST-BAI3; KIT-ANXA1; TNFRSF1B-ITGB2
hsa-miR-152|ZFP161	CAST-BAI3; TNFRSF1B-TGFBR2
hsa-miR-154|ATF2	TCF12-ASPM
hsa-miR-154|ATF3	TCF12-ASPM
hsa-miR-154|ATF4	TCF12-ASPM
hsa-miR-154|CREB1	TCF12-ASPM
hsa-miR-154|ETV4	TCF12-AURKB; TCF12-BAI3; TCF12-ITGB2; TCF12-MEOX2
hsa-miR-154|FLI1	TCF12-ITGB2
hsa-miR-154|GATA1	TCF12-STEAP3
hsa-miR-154|MAFB	TCF12-ASPM; TCF12-AURKB; TCF12-GRIA2
hsa-miR-154|MZF1	TCF12-ITGB2; TCF12-NOTCH1
hsa-miR-154|RORB	TCF12-GRIA2
hsa-miR-154|SMAD1	TCF12-BAI3; TCF12-GRIA2; TCF12-ITGB2; TCF12-STEAP3
hsa-miR-154|TBX5	TCF12-BAI3; TCF12-IDH1; TCF12-ITGB2; TCF12-MEOX2; TCF12-NOTCH1; TCF12-STEAP3
hsa-miR-154|TEAD1	TCF12-AURKB; TCF12-GRIA2; TCF12-IDH1; TCF12-MEOX2
hsa-miR-181c|FOXO1	PDGFRA-ASPM
hsa-miR-181c|FOXO3	PDGFRA-ASPM
hsa-miR-181c|GATA1	GRIA2-ANXA1; GRIA2-CAST; GRIA2-DCX; KLF6-CAST; KLF6-KIT; NRP1-ARNT2; NRP1-CAST; NRP1-COL3A1; NRP1-FN1; NRP1-KIT; PDGFRA-DCX
hsa-miR-181c|MZF1	GRIA2-CAST; KLF6-CAST; NRP1-ARNT2; NRP1-CAST; NRP1-COL1A1; NRP1-COL1A2; NRP1-FN1; PDGFRA-GNAI1; TRIM2-PIK3R1
hsa-miR-181c|NR4A2	NRP1-ARNT2; NRP1-COL3A1
hsa-miR-181c|POU2F1	GRIA2-CAST; GRIA2-DCX; KLF6-CAST; KLF6-KIT; NRP1-CAST; NRP1-KIT; PDGFRA-DCX; TRIM2-PIK3R1
hsa-miR-181c|SMAD1	GRIA2-ANXA1; GRIA2-BAI3; GRIA2-DCX; NRP1-COL1A1; NRP1-COL1A2; PDGFRA-DCX; TRIM2-PIK3R1
hsa-miR-181c|SMAD3	GRIA2-BAI3; NRP1-COL1A2
hsa-miR-181c|SMAD4	GRIA2-BAI3; NRP1-COL1A2
hsa-miR-181c|TFAP2A	GRIA2-CAST; KLF6-CAST; NRP1-ARNT2; NRP1-CAST; NRP1-FN1; PDGFRA-ASPM; TRIM2-PIK3R1
hsa-miR-182|CEBPA	FN1-A2M; FN1-COL3A1; PIK3R1-NTRK3
hsa-miR-182|CEBPB	FN1-COL3A1; PIK3R1-NTRK3
hsa-miR-182|CEBPE	FN1-COL3A1; PIK3R1-NTRK3
hsa-miR-182|CEBPG	FN1-COL3A1; PIK3R1-NTRK3
hsa-miR-182|CRX	FN1-A2M; FN1-COL3A1; PDGFRA-DCX; PIK3R1-ARNT2
hsa-miR-182|ETS1	PDGFRA-ASPM
hsa-miR-182|MZF1	FN1-COL1A1; FN1-COL1A2; PDGFRA-GNAI1; PIK3R1-ARNT2; PIK3R1-NTRK3
hsa-miR-182|NEUROD1	DCX-BAMBI; FN1-COL1A1
hsa-miR-182|NFIA	FN1-COL1A2; PDGFRA-GNAI1
hsa-miR-182|NFIC	FN1-COL1A2; PDGFRA-GNAI1
hsa-miR-182|NKX2-5	DCX-BAMBI; FN1-COL3A1
hsa-miR-182|PURA	FN1-COL1A1; FN1-COL1A2; PIK3R1-ARNT2
hsa-miR-182|SREBF1	FN1-COL1A1; FN1-COL1A2; PIK3R1-NTRK3
hsa-miR-182|SREBF2	PDGFRA-ASPM; PIK3R1-NTRK3
hsa-miR-182|TCF7	FN1-A2M; FN1-COL1A2; FN1-COL3A1; PDGFRA-DCX; PIK3R1-NTRK3
hsa-miR-183|ATF5	TRIM2-PIK3R1
hsa-miR-183|MAFB	DCX-BAMBI
hsa-miR-183|MYOG	TRIM2-PIK3R1
hsa-miR-183|NEUROD1	DCX-BAMBI
hsa-miR-183|SOX10	TRIM2-PIK3R1
hsa-miR-183|TCF3	TRIM2-PIK3R1
hsa-miR-183|TFAP2A	DCX-BAMBI; TRIM2-PIK3R1
hsa-miR-183|ZBTB7A	DCX-BAMBI
hsa-miR-195|ELK1	LRP1B-GRIA2; PHIP-CENPF
hsa-miR-195|ETS1	LRP1B-GRIA2; PHIP-ASPM
hsa-miR-195|GATA1	PHIP-CENPF
hsa-miR-195|RORB	LRP1B-GRIA2
hsa-miR-195|TBX5	LRP1B-BAI3; TRIM2-PIK3R1
hsa-miR-195|ZBTB7A	LRP1B-BAI3
hsa-miR-196b|CRX	PDGFRA-DCX
hsa-miR-196b|FOXO1	PDGFRA-ASPM
hsa-miR-196b|GATA1	PDGFRA-DCX
hsa-miR-196b|GATA2	PDGFRA-DCX
hsa-miR-196b|NEUROD1	COL1A2-COL1A1; COL3A1-COL1A1
hsa-miR-196b|NR3C1	COL1A2-COL1A1; COL3A1-COL1A1; PDGFRA-DCX
hsa-miR-196b|POU2F1	PDGFRA-DCX
hsa-miR-196b|SREBF2	PDGFRA-ASPM
hsa-miR-196b|TBP	COL1A2-COL1A1; COL3A1-COL1A1
hsa-miR-196b|TEAD1	COL3A1-COL1A2
hsa-miR-196b|WT1	COL3A1-COL1A2
hsa-miR-196b|ZBTB7A	COL1A1-BAI3
hsa-miR-196b|ZFP161	COL1A1-BAI3
hsa-miR-203|GATA1	PDGFRA-DCX
hsa-miR-203|MAFB	DCX-BAMBI; PDGFRA-ASPM; PDGFRA-DCX
hsa-miR-203|MYF6	TRIM2-PIK3R1
hsa-miR-203|MYOD1	TRIM2-PIK3R1
hsa-miR-203|MYOG	TRIM2-PIK3R1
hsa-miR-203|MZF1	PDGFRA-GNAI1; TRIM2-PIK3R1
hsa-miR-203|SP2	DCX-BAMBI; TRIM2-PIK3R1
hsa-miR-203|SP3	DCX-BAMBI
hsa-miR-203|SREBF2	PDGFRA-ASPM
hsa-miR-203|TCF3	TRIM2-PIK3R1
hsa-miR-203|TCF7	PDGFRA-DCX
hsa-miR-203|TFAP2A	DCX-BAMBI; PDGFRA-ASPM; TRIM2-PIK3R1
hsa-miR-203|ZBTB7A	DCX-BAMBI
hsa-miR-204|ETV4	TRIM2-PIK3R1; TRMT5-AURKB
hsa-miR-204|SMAD1	TRIM2-PIK3R1
hsa-miR-204|SOX10	TRIM2-PIK3R1
hsa-miR-204|TEAD1	TRIM2-PIK3R1; TRMT5-AURKB
hsa-miR-218|ATF2	SV2B-RTN1
hsa-miR-218|ATF3	SV2B-RTN1
hsa-miR-218|ATF4	SV2B-RTN1
hsa-miR-218|ATF5	SV2B-RTN1
hsa-miR-218|CREB1	SV2B-RTN1
hsa-miR-218|ELK1	GRIA2-CAST; KIT-CAST; KIT-IQGAP1
hsa-miR-218|ERF	GRIA2-CAST; KIT-CAST
hsa-miR-218|ETS1	GRIA2-CAST; KIT-CAST
hsa-miR-218|FLI1	GRIA2-CAST; KIT-CAST
hsa-miR-218|FOXA1	SV2B-RTN1
hsa-miR-218|GATA1	GRIA2-ANXA1; GRIA2-CAST; GRIA2-DCX; KIT-ANXA1; KIT-CAST; SV2B-RTN1
hsa-miR-218|HOXA5	GRIA2-CAST; KIT-CAST
hsa-miR-218|IRF6	GRIA2-CAST; KIT-CAST
hsa-miR-218|NEUROD1	DCX-BAMBI; SV2B-RTN1
hsa-miR-218|POU2F1	GRIA2-CAST; GRIA2-DCX; KIT-CAST; SV2B-RTN1
hsa-miR-218|POU3F2	GRIA2-CAST; KIT-CAST
hsa-miR-218|SMAD1	GRIA2-ANXA1; GRIA2-BAI3; GRIA2-DCX; KIT-ANXA1
hsa-miR-218|SREBF2	KIT-IQGAP1; SV2B-RTN1
hsa-miR-218|TBP	GRIA2-ANXA1; KIT-ANXA1; SV2B-RTN1
hsa-miR-219-5p|AHR	TCF12-AURKB; TCF12-MEOX2; TCF12-NOTCH1
hsa-miR-219-5p|ARNT	TCF12-AURKB
hsa-miR-219-5p|ATF2	TCF12-ASPM
hsa-miR-219-5p|ATF3	TCF12-ASPM
hsa-miR-219-5p|ATF4	TCF12-ASPM
hsa-miR-219-5p|ATF5	TCF12-ASPM
hsa-miR-219-5p|CREB1	TCF12-ASPM
hsa-miR-219-5p|CRX	TCF12-IDH1; TCF12-MEOX2
hsa-miR-219-5p|EGR1	TCF12-IDH1
hsa-miR-219-5p|EGR2	TCF12-IDH1
hsa-miR-219-5p|EGR3	TCF12-IDH1
hsa-miR-219-5p|ELK1	TCF12-AURKB; TCF12-GRIA2; TCF12-ITGB2; TCF12-NOTCH1; TCF12-STEAP3
hsa-miR-219-5p|EP300	TCF12-ASPM; TCF12-AURKB; TCF12-NOTCH1
hsa-miR-219-5p|ETS1	TCF12-ASPM; TCF12-GRIA2; TCF12-IDH1; TCF12-ITGB2; TCF12-NOTCH1; TCF12-STEAP3
hsa-miR-219-5p|GATA1	TCF12-STEAP3
hsa-miR-219-5p|GTF2I	TCF12-BAI3
hsa-miR-219-5p|HIF1A	TCF12-AURKB; TCF12-BAI3
hsa-miR-219-5p|HNF1B	TCF12-NOTCH1
hsa-miR-219-5p|MYOG	TCF12-AURKB
hsa-miR-219-5p|MZF1	TCF12-ITGB2; TCF12-NOTCH1
hsa-miR-219-5p|NEUROD1	TCF12-ITGB2; TCF12-MEOX2; TCF12-NOTCH1; TCF12-STEAP3
hsa-miR-219-5p|NR3C1	TCF12-ITGB2
hsa-miR-219-5p|NR4A2	TCF12-ITGB2
hsa-miR-219-5p|POU2F1	TCF12-AURKB; TCF12-GRIA2; TCF12-NOTCH1
hsa-miR-219-5p|PURA	TCF12-GRIA2; TCF12-MEOX2; TCF12-NOTCH1; TCF12-STEAP3
hsa-miR-219-5p|RAX	TCF12-MEOX2
hsa-miR-219-5p|RUNX2	TCF12-ITGB2; TCF12-MEOX2; TCF12-STEAP3
hsa-miR-219-5p|SP1	TCF12-AURKB; TCF12-BAI3; TCF12-IDH1; TCF12-NOTCH1
hsa-miR-219-5p|SP2	TCF12-AURKB; TCF12-NOTCH1
hsa-miR-219-5p|SP3	TCF12-AURKB; TCF12-NOTCH1
hsa-miR-219-5p|SP4	TCF12-AURKB; TCF12-NOTCH1
hsa-miR-219-5p|SREBF1	TCF12-NOTCH1
hsa-miR-219-5p|SREBF2	TCF12-ASPM; TCF12-NOTCH1
hsa-miR-219-5p|TEAD1	TCF12-AURKB; TCF12-GRIA2; TCF12-IDH1; TCF12-MEOX2
hsa-miR-219-5p|TFAP2A	TCF12-ASPM; TCF12-IDH1; TCF12-NOTCH1
hsa-miR-219-5p|TFAP4	TCF12-MEOX2
hsa-miR-219-5p|WT1	TCF12-GRIA2; TCF12-NOTCH1
hsa-miR-219-5p|ZBTB7A	TCF12-BAI3; TCF12-MEOX2; TCF12-STEAP3
hsa-miR-219-5p|ZFP161	TCF12-BAI3; TCF12-NOTCH1
hsa-miR-21|HMGA1	PIK3R1-NTRK3; TGFBR2-TCF12
hsa-miR-21|IRF1	TGFBR2-CAST
hsa-miR-21|NR4A2	PIK3R1-ARNT2; TGFBR2-ITGB2
hsa-miR-21|SMAD1	TGFBR2-A2M; TGFBR2-ITGB2; TGFBR2-NRP1
hsa-miR-21|SMAD2	TGFBR2-ITGB2; TGFBR2-NRP1
hsa-miR-21|SMAD3	TGFBR2-ITGB2; TGFBR2-NRP1
hsa-miR-21|SMAD4	TGFBR2-ITGB2; TGFBR2-NRP1
hsa-miR-21|SOX10	PIK3R1-ARNT2; TGFBR2-ITGB2; TGFBR2-TCF12
hsa-miR-21|TBX5	PIK3R1-ARNT2; TGFBR2-ITGB2
hsa-miR-21|TCF7	PIK3R1-NTRK3; TGFBR2-A2M; TGFBR2-NRP1; TGFBR2-TCF12
hsa-miR-21|TEAD1	TGFBR2-A2M; TGFBR2-AXL; TGFBR2-NRP1; TGFBR2-TCF12; TRMT5-AURKB
hsa-miR-21|YY1	PIK3R1-ARNT2; TGFBR2-TCF12
hsa-miR-221|CRX	KPNA2-CENPF
hsa-miR-221|GATA1	KPNA2-CENPF
hsa-miR-221|NEUROD1	DCX-BAMBI; KPNA2-CHEK1
hsa-miR-222|CRX	KPNA2-CENPF
hsa-miR-222|GATA1	KPNA2-CENPF
hsa-miR-222|NEUROD1	DCX-BAMBI; KPNA2-CHEK1
hsa-miR-23a|ELK1	ZEB1-GRIA2; ZEB1-NOTCH1; ZEB1-TCF12
hsa-miR-23a|ETS1	ZEB1-GRIA2; ZEB1-NOTCH1
hsa-miR-23a|ETV4	MYO5C-MEOX2; ZEB1-BAI3; ZEB1-TCF12
hsa-miR-23a|MZF1	MYO5C-ARNT2; ZEB1-CTSH; ZEB1-NOTCH1; ZEB1-PROX1
hsa-miR-23a|NEUROD1	MYO5C-MEOX2; ZEB1-JAG1; ZEB1-NOTCH1; ZEB1-PROX1
hsa-miR-23a|NKX2-5	MYO5C-MEOX2; ZEB1-TCF12
hsa-miR-23a|NR4A2	MYO5C-ARNT2
hsa-miR-23a|POU2F1	ZEB1-GRIA2; ZEB1-NOTCH1
hsa-miR-23a|RUNX3	MYO5C-MEOX2
hsa-miR-23a|SMAD3	ZEB1-BAI3; ZEB1-GRIA2
hsa-miR-23a|SREBF1	ZEB1-NOTCH1; ZEB1-PROX1
hsa-miR-23a|SREBF2	ZEB1-CTSH; ZEB1-NOTCH1; ZEB1-PROX1
hsa-miR-23a|TBX5	MYO5C-ARNT2; MYO5C-MEOX2; ZEB1-BAI3; ZEB1-NOTCH1
hsa-miR-23b|CRX	MYO5C-ARNT2; MYO5C-MEOX2; ZEB1-TCF12
hsa-miR-23b|FOXA1	ZEB1-PROX1
hsa-miR-23b|MAF	ZEB1-GRIA2
hsa-miR-23b|MAFB	ZEB1-GRIA2; ZEB1-JAG1
hsa-miR-23b|NEUROD1	MYO5C-MEOX2; ZEB1-JAG1; ZEB1-NOTCH1; ZEB1-PROX1
hsa-miR-23b|NR4A2	MYO5C-ARNT2
hsa-miR-23b|POU3F2	ZEB1-NOTCH1
hsa-miR-23b|TFAP4	MYO5C-MEOX2; ZEB1-JAG1
hsa-miR-25|GATA1	NOTCH1-ARNT2; NOTCH1-MGMT
hsa-miR-25|MAFB	DCX-BAMBI
hsa-miR-25|MZF1	NOTCH1-ARNT2; NOTCH1-CTSH
hsa-miR-25|NEUROD1	DCX-BAMBI
hsa-miR-25|NKX2-5	DCX-BAMBI
hsa-miR-25|PURA	NOTCH1-ARNT2; NOTCH1-MGMT
hsa-miR-25|TBX5	NOTCH1-ARNT2; NOTCH1-MGMT
hsa-miR-25|ZBTB7A	DCX-BAMBI
hsa-miR-26b|EP300	PDGFRA-ASPM
hsa-miR-26b|ETS1	PDGFRA-ASPM
hsa-miR-26b|MAFB	PDGFRA-ASPM; PDGFRA-DCX
hsa-miR-26b|MZF1	PDGFRA-GNAI1
hsa-miR-26b|NR3C1	PDGFRA-DCX
hsa-miR-26b|SREBF2	PDGFRA-ASPM
hsa-miR-26b|TCF7	PDGFRA-DCX
hsa-miR-27a|BCL6	PDGFRA-DCX
hsa-miR-27a|ETS1	PDGFRA-ASPM
hsa-miR-27a|ETV4	PDGFRA-GNAI1; TRIM2-PIK3R1
hsa-miR-27a|MZF1	PDGFRA-GNAI1; TRIM2-PIK3R1
hsa-miR-27a|NEUROD1	DCX-BAMBI
hsa-miR-27a|NKX2-5	DCX-BAMBI
hsa-miR-27a|POU2F1	PDGFRA-DCX; TRIM2-PIK3R1
hsa-miR-27a|SMAD3	DCX-BAMBI
hsa-miR-27a|SREBF2	PDGFRA-ASPM
hsa-miR-27b|CRX	PDGFRA-DCX; TRIM2-PIK3R1
hsa-miR-27b|MAFB	DCX-BAMBI; PDGFRA-ASPM; PDGFRA-DCX
hsa-miR-27b|MYOG	TRIM2-PIK3R1
hsa-miR-27b|NEUROD1	DCX-BAMBI
hsa-miR-27b|NKX2-5	DCX-BAMBI
hsa-miR-27b|NR3C1	PDGFRA-DCX
hsa-miR-27b|SMAD1	PDGFRA-DCX; TRIM2-PIK3R1
hsa-miR-29c|GATA1	PIK3R1-ARNT2; PIK3R1-NTRK3
hsa-miR-29c|MAFB	DCX-BAMBI
hsa-miR-29c|NEUROD1	COL1A2-COL1A1; DCX-BAMBI
hsa-miR-29c|SMAD3	COL1A1-BAI3; DCX-BAMBI
hsa-miR-29c|TBX5	COL1A1-BAI3; PIK3R1-ARNT2
hsa-miR-30d|YY1	NOTCH1-ARNT2
hsa-miR-30e|CRX	NOTCH1-ARNT2
hsa-miR-30e|MAFB	DCX-BAMBI
hsa-miR-30e|MZF1	NOTCH1-ARNT2; NOTCH1-CTSH
hsa-miR-30e|NEUROD1	DCX-BAMBI
hsa-miR-30e|SOX10	NOTCH1-ARNT2
hsa-miR-30e|TBX5	NOTCH1-ARNT2; NOTCH1-MGMT
hsa-miR-34a|ELK1	TCF12-AURKB; TCF12-GRIA2; TCF12-ITGB2; TCF12-NOTCH1; TCF12-STEAP3
hsa-miR-34a|ETS1	PDGFRA-ASPM; TCF12-ASPM; TCF12-GRIA2; TCF12-IDH1; TCF12-ITGB2; TCF12-NOTCH1; TCF12-STEAP3
hsa-miR-34a|MAF	TCF12-GRIA2
hsa-miR-34a|MAFB	DCX-BAMBI; PDGFRA-ASPM; PDGFRA-DCX; TCF12-ASPM; TCF12-AURKB; TCF12-GRIA2
hsa-miR-34a|MYOD1	TCF12-AURKB
hsa-miR-34a|MZF1	PDGFRA-GNAI1; TCF12-ITGB2; TCF12-NOTCH1
hsa-miR-34a|NEUROD1	DCX-BAMBI; TCF12-ITGB2; TCF12-MEOX2; TCF12-NOTCH1; TCF12-STEAP3
hsa-miR-34a|SREBF1	TCF12-NOTCH1
hsa-miR-34a|STAT1	TCF12-GRIA2
hsa-miR-34a|STAT5A	TCF12-GRIA2
hsa-miR-34a|TCF12	TCF12-AURKB; TCF12-ITGB2
hsa-miR-34a|ZEB1	TCF12-GRIA2
hsa-miR-425|CEBPA	TNC-ANXA1; TNC-CAST
hsa-miR-425|CEBPB	TNC-ANXA1
hsa-miR-425|CEBPE	TNC-ANXA1
hsa-miR-425|CEBPG	TNC-ANXA1
hsa-miR-425|CRX	TNC-ANXA1; TNC-CAST
hsa-miR-425|ELK1	TNC-CAST; TNC-IQGAP1
hsa-miR-425|ERF	TNC-CAST
hsa-miR-425|ETS1	TNC-CAST
hsa-miR-425|ETV4	TNC-ANXA1; TNC-CAST
hsa-miR-425|FLI1	TNC-CAST
hsa-miR-425|MZF1	TNC-CAST
hsa-miR-425|SP1	TNC-IQGAP1; TNC-SLC2A1
hsa-miR-425|SP2	TNC-IQGAP1; TNC-SLC2A1
hsa-miR-425|SP3	TNC-IQGAP1; TNC-SLC2A1
hsa-miR-425|SP4	TNC-IQGAP1; TNC-SLC2A1
hsa-miR-425|TEAD1	TNC-ANXA1
hsa-miR-495|ATF2	TNFRSF1B-TGFBR2
hsa-miR-495|ATF3	TNFRSF1B-TGFBR2
hsa-miR-495|ATF4	TNFRSF1B-TGFBR2
hsa-miR-495|CREB1	NOTCH1-ARNT2; PIK3R1-ARNT2; TNFRSF1B-TGFBR2
hsa-miR-495|GATA1	NOTCH1-ARNT2; NOTCH1-MGMT; PIK3R1-ARNT2; PIK3R1-NTRK3; TNC-ANXA1; TNC-CAST; TNFRSF1B-A2M; TNFRSF1B-CAST; TNFRSF1B-TCF12
hsa-miR-495|GATA2	TNC-CAST; TNFRSF1B-CAST
hsa-miR-495|GATA3	TNC-ANXA1; TNC-CAST; TNFRSF1B-CAST
hsa-miR-495|MAFB	LRP1B-GRIA2; TNC-CAST; TNFRSF1B-CAST; TNFRSF1B-MAN2B1
hsa-miR-495|MZF1	NOTCH1-ARNT2; NOTCH1-CTSH; PIK3R1-ARNT2; PIK3R1-NTRK3; TNC-CAST; TNFRSF1B-CAST; TNFRSF1B-ITGB2
hsa-miR-495|NEUROD1	TNFRSF1B-ITGB2; TNFRSF1B-MAN2B1; TNFRSF1B-TGFBR2
hsa-miR-495|RORB	LRP1B-GRIA2
hsa-miR-495|SMAD1	LRP1B-BAI3; LRP1B-GRIA2; TNC-ANXA1; TNC-SLC2A1; TNFRSF1B-A2M; TNFRSF1B-ITGB2; TNFRSF1B-MAN2B1
hsa-miR-495|SOX10	NOTCH1-ARNT2; PIK3R1-ARNT2; TNFRSF1B-ITGB2; TNFRSF1B-MAN2B1; TNFRSF1B-TCF12
hsa-miR-495|TCF3	NOTCH1-CTSH
hsa-miR-495|TCF7	PIK3R1-NTRK3; TNC-ANXA1; TNFRSF1B-A2M; TNFRSF1B-TCF12
hsa-miR-503|CRX	CHEK1-CENPF; PIK3R1-ARNT2
hsa-miR-503|ELK1	CHEK1-AURKB; CHEK1-CENPF
hsa-miR-503|ETS1	CHEK1-ASPM
hsa-miR-503|FOXO3	CHEK1-ASPM
hsa-miR-503|HMGA1	PIK3R1-NTRK3
hsa-miR-503|MZF1	PIK3R1-ARNT2; PIK3R1-NTRK3
hsa-miR-503|TCF7	PIK3R1-NTRK3
hsa-miR-503|YY1	PIK3R1-ARNT2
hsa-miR-503|ZBTB7A	PIK3R1-NTRK3
hsa-miR-92b|CREB1	NOTCH1-ARNT2
hsa-miR-92b|ELK1	NOTCH1-MGMT
hsa-miR-92b|EP300	NOTCH1-ARNT2
hsa-miR-92b|MZF1	NOTCH1-ARNT2; NOTCH1-CTSH
hsa-miR-92b|PURA	NOTCH1-ARNT2; NOTCH1-MGMT
hsa-miR-92b|SOX10	NOTCH1-ARNT2
hsa-miR-92b|SP2	DCX-BAMBI; NOTCH1-MGMT
hsa-miR-92b|ZBTB7A	DCX-BAMBI
hsa-miR-93|GATA1	KPNA2-CENPF; NTRK3-ARNT2; PDGFRA-DCX; PIK3R1-ARNT2; PIK3R1-NTRK3; SV2B-RTN1
hsa-miR-93|GATA2	PDGFRA-DCX; SV2B-RTN1
hsa-miR-93|MAFB	KPNA2-ASPM; PDGFRA-ASPM; PDGFRA-DCX; SV2B-RTN1
hsa-miR-93|MZF1	NTRK3-ARNT2; PDGFRA-GNAI1; PIK3R1-ARNT2; PIK3R1-NTRK3; SV2B-RTN1
hsa-miR-93|NEUROD1	KPNA2-CHEK1; SV2B-RTN1
hsa-miR-93|NFE2L1	SV2B-RTN1
hsa-miR-93|PURA	NTRK3-ARNT2; NTRK3-NRP1; PIK3R1-ARNT2
hsa-miR-93|TBX5	NTRK3-ARNT2; NTRK3-BAI3; PDGFRA-DCX; PIK3R1-ARNT2; SV2B-RTN1
hsa-miR-98|CRX	COL4A2-COL3A1; NTRK3-ARNT2; STEAP3-CAST; STEAP3-MEOX2; TNFRSF1B-A2M; TNFRSF1B-CAST; TNFRSF1B-TCF12
hsa-miR-98|GATA1	COL4A2-COL3A1; NTRK3-ARNT2; STEAP3-CAST; STEAP3-LTF; TNFRSF1B-A2M; TNFRSF1B-CAST; TNFRSF1B-TCF12
hsa-miR-98|NR3C1	TNFRSF1B-ITGB2
hsa-miR-98|POU3F2	STEAP3-CAST; TNFRSF1B-CAST
hsa-miR-98|SMAD1	COL1A1-BAI3; NTRK3-BAI3; NTRK3-NRP1; STEAP3-GRIA2; STEAP3-LTF; TNFRSF1B-A2M; TNFRSF1B-ITGB2; TNFRSF1B-MAN2B1
hsa-miR-98|SOX10	COL4A2-COL3A1; NTRK3-ARNT2; TNFRSF1B-ITGB2; TNFRSF1B-MAN2B1; TNFRSF1B-TCF12
hsa-miR-98|SREBF1	STEAP3-LTF; TNFRSF1B-MAN2B1; TNFRSF1B-TGFBR2
hsa-miR-98|SREBF2	NTRK3-NRP1; TNFRSF1B-TGFBR2
hsa-miR-98|TCF7	COL4A2-COL3A1; NTRK3-NRP1; STEAP3-MEOX2; TNFRSF1B-A2M; TNFRSF1B-TCF12
hsa-miR-98|TCF7L2	TNFRSF1B-TCF12
hsa-miR-9|ASCL1	NRP1-COL1A2; NRP1-KIT; TGFBR2-AXL
hsa-miR-9|ATF2	COL4A2-COL3A1; NRP1-COL3A1; NRP1-FN1; TRIM2-PIK3R1
hsa-miR-9|ATF3	COL4A2-COL3A1; NRP1-COL3A1; NRP1-FN1; TRIM2-PIK3R1
hsa-miR-9|ATF4	COL4A2-COL3A1; NRP1-COL3A1; NRP1-FN1; TRIM2-PIK3R1
hsa-miR-9|ATF5	NRP1-COL1A1; NRP1-FN1; TRIM2-PIK3R1
hsa-miR-9|CEBPA	COL4A2-COL3A1; NRP1-CAST; NRP1-COL3A1; TGFBR2-A2M; TGFBR2-AXL; TGFBR2-CAST; TNC-ANXA1; TNC-CAST; TRIM2-PIK3R1
hsa-miR-9|CREB1	COL4A2-COL3A1; NRP1-ARNT2; NRP1-COL3A1; NRP1-FN1; TRIM2-PIK3R1
hsa-miR-9|ELK1	NRP1-CAST; NRP1-IQGAP1; TGFBR2-CAST; TGFBR2-IQGAP1; TGFBR2-ITGB2; TGFBR2-TCF12; TNC-CAST; TNC-IQGAP1
hsa-miR-9|EP300	NRP1-ARNT2; NRP1-COL1A2; TGFBR2-A2M
hsa-miR-9|ETV4	NRP1-CAST; NRP1-COL1A1; TGFBR2-A2M; TGFBR2-CAST; TGFBR2-ITGB2; TGFBR2-TCF12; TNC-ANXA1; TNC-CAST; TRIM2-PIK3R1
hsa-miR-9|GATA1	COL4A2-COL3A1; NRP1-ARNT2; NRP1-CAST; NRP1-COL3A1; NRP1-FN1; NRP1-KIT; TGFBR2-A2M; TGFBR2-CAST; TGFBR2-TCF12; TNC-ANXA1; TNC-CAST
hsa-miR-9|GATA2	COL4A2-COL3A1; NRP1-CAST; NRP1-COL3A1; TGFBR2-CAST; TNC-CAST
hsa-miR-9|GATA3	COL4A2-COL3A1; NRP1-CAST; NRP1-COL3A1; TGFBR2-CAST; TNC-ANXA1; TNC-CAST
hsa-miR-9|HMGA1	COL4A2-COL3A1; NRP1-COL3A1; TGFBR2-TCF12; TNC-ANXA1
hsa-miR-9|JUN	NRP1-FN1
hsa-miR-9|MAFB	NRP1-CAST; TGFBR2-CAST; TNC-CAST
hsa-miR-9|MYF6	NRP1-COL1A2; NRP1-KIT; TGFBR2-AXL; TRIM2-PIK3R1
hsa-miR-9|MYOD1	NRP1-COL1A2; NRP1-KIT; TGFBR2-AXL; TRIM2-PIK3R1
hsa-miR-9|MYOG	NRP1-COL1A2; NRP1-KIT; TGFBR2-AXL; TRIM2-PIK3R1
hsa-miR-9|MZF1	NRP1-ARNT2; NRP1-CAST; NRP1-COL1A1; NRP1-COL1A2; NRP1-FN1; TGFBR2-AXL; TGFBR2-CAST; TGFBR2-ITGB2; TNC-CAST; TRIM2-PIK3R1
hsa-miR-9|NEUROD1	NRP1-COL1A1; NRP1-KIT; TGFBR2-AXL; TGFBR2-ITGB2
hsa-miR-9|NKX2-5	COL4A2-COL3A1; NRP1-COL3A1; TGFBR2-TCF12; TNC-SLC2A1
hsa-miR-9|NR3C1	NRP1-COL1A1; TGFBR2-ITGB2
hsa-miR-9|POU2F1	NRP1-CAST; NRP1-KIT; TGFBR2-A2M; TGFBR2-CAST; TNC-CAST; TRIM2-PIK3R1
hsa-miR-9|POU3F2	NRP1-CAST; NRP1-KIT; TGFBR2-CAST; TNC-CAST
hsa-miR-9|REL	TGFBR2-AXL
hsa-miR-9|RELA	TGFBR2-AXL
hsa-miR-9|SOX10	COL4A2-COL3A1; NRP1-ARNT2; NRP1-COL1A1; NRP1-COL1A2; NRP1-COL3A1; NRP1-KIT; TGFBR2-ITGB2; TGFBR2-TCF12; TRIM2-PIK3R1
hsa-miR-9|SP1	NRP1-FN1; NRP1-IQGAP1; TGFBR2-IQGAP1; TNC-IQGAP1; TNC-SLC2A1
hsa-miR-9|SREBF1	NRP1-COL1A1; NRP1-COL1A2; NRP1-FN1
hsa-miR-9|TBP	COL4A2-COL3A1; NRP1-COL1A1; NRP1-COL3A1; NRP1-FN1; TNC-ANXA1
hsa-miR-9|TBX5	NRP1-ARNT2; NRP1-COL1A2; TGFBR2-ITGB2; TNC-ANXA1; TRIM2-PIK3R1
hsa-miR-9|TCF12	NRP1-COL1A2; NRP1-KIT; TGFBR2-AXL; TGFBR2-ITGB2
hsa-miR-9|TCF3	NRP1-COL1A2; NRP1-KIT; TGFBR2-AXL; TRIM2-PIK3R1
hsa-miR-9|TCF4	NRP1-COL1A2; NRP1-KIT; TGFBR2-AXL
hsa-miR-9|TFAP2A	NRP1-ARNT2; NRP1-CAST; NRP1-FN1; TGFBR2-CAST; TNC-CAST; TRIM2-PIK3R1
hsa-miR-9|WT1	NRP1-COL1A2; NRP1-KIT
hsa-miR-9|ZBTB7A	NRP1-KIT; TNC-SLC2A1

## Sheet: miRNA-FFLs
Merged 4-node FFLs: miRNA-FFLs
FFL ID	GBM-related gene-gene pairs
hsa-miR-130a|SMAD4	CAST-BAI3; LRP1B-BAI3; LRP1B-GRIA2; MEOX2-LTF; NRP1-COL1A2; TNFRSF1B-ITGB2; TNFRSF1B-MAN2B1; ZEB1-BAI3; ZEB1-GRIA2
hsa-miR-340|TBX5	CAST-ANXA1; CAST-BAI3; GRIA2-ANXA1; GRIA2-BAI3; GRIA2-DCX; KIT-ANXA1; LRP1B-BAI3; NOTCH1-ARNT2; NOTCH1-MGMT
hsa-miR-130a|SP1	CAST-BAI3; KIT-IQGAP1; LRP1B-BAI3; MEOX2-IDH1; NRP1-FN1; NRP1-IQGAP1; ZEB1-BAI3; ZEB1-NOTCH1
hsa-let-7a|SMAD2	COL1A1-BAI3; NTRK3-BAI3; NTRK3-NRP1; STEAP3-GRIA2; STEAP3-LTF; TNFRSF1B-ITGB2; TNFRSF1B-MAN2B1
hsa-let-7c|SMAD2	COL1A1-BAI3; NTRK3-BAI3; NTRK3-NRP1; STEAP3-GRIA2; STEAP3-LTF; TNFRSF1B-ITGB2; TNFRSF1B-MAN2B1
hsa-let-7f|SMAD2	COL1A1-BAI3; NTRK3-BAI3; NTRK3-NRP1; STEAP3-GRIA2; STEAP3-LTF; TNFRSF1B-ITGB2; TNFRSF1B-MAN2B1
hsa-let-7g|SMAD2	COL1A1-BAI3; NTRK3-BAI3; NTRK3-NRP1; STEAP3-GRIA2; STEAP3-LTF; TNFRSF1B-ITGB2; TNFRSF1B-MAN2B1
hsa-let-7i|SMAD2	COL1A1-BAI3; NTRK3-BAI3; NTRK3-NRP1; STEAP3-GRIA2; STEAP3-LTF; TNFRSF1B-ITGB2; TNFRSF1B-MAN2B1
hsa-miR-98|SMAD2	COL1A1-BAI3; NTRK3-BAI3; NTRK3-NRP1; STEAP3-GRIA2; STEAP3-LTF; TNFRSF1B-ITGB2; TNFRSF1B-MAN2B1
hsa-miR-9|TEAD1	NRP1-COL1A2; TGFBR2-A2M; TGFBR2-AXL; TGFBR2-NRP1; TGFBR2-TCF12; TNC-ANXA1; TRIM2-PIK3R1
hsa-let-7a|HMGA1	COL1A1-BAI3; COL4A2-COL3A1; NTRK3-BAI3; STEAP3-MEOX2; TNFRSF1B-TCF12; TNFRSF1B-TGFBR2
hsa-let-7a|TBX5	COL1A1-BAI3; NTRK3-ARNT2; NTRK3-BAI3; STEAP3-LTF; STEAP3-MEOX2; TNFRSF1B-ITGB2
hsa-let-7c|HMGA1	COL1A1-BAI3; COL4A2-COL3A1; NTRK3-BAI3; STEAP3-MEOX2; TNFRSF1B-TCF12; TNFRSF1B-TGFBR2
hsa-let-7c|TBX5	COL1A1-BAI3; NTRK3-ARNT2; NTRK3-BAI3; STEAP3-LTF; STEAP3-MEOX2; TNFRSF1B-ITGB2
hsa-let-7e|HMGA1	COL1A1-BAI3; COL4A2-COL3A1; NTRK3-BAI3; STEAP3-MEOX2; TNFRSF1B-TCF12; TNFRSF1B-TGFBR2
hsa-let-7e|TBX5	COL1A1-BAI3; NTRK3-ARNT2; NTRK3-BAI3; STEAP3-LTF; STEAP3-MEOX2; TNFRSF1B-ITGB2
hsa-let-7f|HMGA1	COL1A1-BAI3; COL4A2-COL3A1; NTRK3-BAI3; STEAP3-MEOX2; TNFRSF1B-TCF12; TNFRSF1B-TGFBR2
hsa-let-7f|TBX5	COL1A1-BAI3; NTRK3-ARNT2; NTRK3-BAI3; STEAP3-LTF; STEAP3-MEOX2; TNFRSF1B-ITGB2
hsa-let-7g|HMGA1	COL1A1-BAI3; COL4A2-COL3A1; NTRK3-BAI3; STEAP3-MEOX2; TNFRSF1B-TCF12; TNFRSF1B-TGFBR2
hsa-let-7g|TBX5	COL1A1-BAI3; NTRK3-ARNT2; NTRK3-BAI3; STEAP3-LTF; STEAP3-MEOX2; TNFRSF1B-ITGB2
hsa-let-7i|HMGA1	COL1A1-BAI3; COL4A2-COL3A1; NTRK3-BAI3; STEAP3-MEOX2; TNFRSF1B-TCF12; TNFRSF1B-TGFBR2
hsa-let-7i|TBX5	COL1A1-BAI3; NTRK3-ARNT2; NTRK3-BAI3; STEAP3-LTF; STEAP3-MEOX2; TNFRSF1B-ITGB2
hsa-miR-130a|POU3F2	KIT-CAST; NRP1-CAST; NRP1-KIT; SLC2A1-CAST; TNFRSF1B-CAST; ZEB1-NOTCH1
hsa-miR-139-5p|ETS1	TCF12-ASPM; TCF12-GRIA2; TCF12-IDH1; TCF12-ITGB2; TCF12-NOTCH1; TCF12-STEAP3
hsa-miR-181a|CEBPA	GRIA2-ANXA1; GRIA2-CAST; KLF6-CAST; NRP1-CAST; NRP1-COL3A1; TRIM2-PIK3R1
hsa-miR-181b|CEBPA	GRIA2-ANXA1; GRIA2-CAST; KLF6-CAST; NRP1-CAST; NRP1-COL3A1; TRIM2-PIK3R1
hsa-miR-181c|CEBPA	GRIA2-ANXA1; GRIA2-CAST; KLF6-CAST; NRP1-CAST; NRP1-COL3A1; TRIM2-PIK3R1
hsa-miR-98|HMGA1	COL1A1-BAI3; COL4A2-COL3A1; NTRK3-BAI3; STEAP3-MEOX2; TNFRSF1B-TCF12; TNFRSF1B-TGFBR2
hsa-miR-98|TBX5	COL1A1-BAI3; NTRK3-ARNT2; NTRK3-BAI3; STEAP3-LTF; STEAP3-MEOX2; TNFRSF1B-ITGB2
hsa-miR-137|TFAP2A	NOTCH1-ARNT2; NRP1-ARNT2; NRP1-CAST; NRP1-FN1; PDGFRA-ASPM
hsa-miR-148a|TEAD1	CAST-ANXA1; KIT-ANXA1; TNFRSF1B-A2M; TNFRSF1B-MAN2B1; TNFRSF1B-TCF12
hsa-miR-181a|CREB1	NRP1-ARNT2; NRP1-COL3A1; NRP1-FN1; PDGFRA-ASPM; TRIM2-PIK3R1
hsa-miR-181b|CREB1	NRP1-ARNT2; NRP1-COL3A1; NRP1-FN1; PDGFRA-ASPM; TRIM2-PIK3R1
hsa-miR-181c|CREB1	NRP1-ARNT2; NRP1-COL3A1; NRP1-FN1; PDGFRA-ASPM; TRIM2-PIK3R1
hsa-miR-340|TEAD1	CAST-ANXA1; GRIA2-ANXA1; KIT-ANXA1; LRP1B-GRIA2; TRMT5-AURKB
hsa-miR-495|PURA	LRP1B-GRIA2; NOTCH1-ARNT2; NOTCH1-MGMT; PIK3R1-ARNT2; TNFRSF1B-MAN2B1
hsa-miR-124|CEBPA	NRP1-CAST; NRP1-COL3A1; STEAP3-CAST; STEAP3-MEOX2
hsa-miR-124|TEAD1	NRP1-COL1A2; STEAP3-GRIA2; STEAP3-LTF; STEAP3-MEOX2
hsa-miR-130a|HOXA5	KIT-CAST; NRP1-CAST; SLC2A1-CAST; TNFRSF1B-CAST
hsa-miR-130a|ZNF148	KIT-CAST; NRP1-CAST; SLC2A1-CAST; TNFRSF1B-CAST
hsa-miR-135a|ELK1	TGFBR2-CAST; TGFBR2-IQGAP1; TGFBR2-ITGB2; TGFBR2-TCF12
hsa-miR-155|SMAD2	LRP1B-BAI3; LRP1B-GRIA2; TGFBR2-ITGB2; TGFBR2-NRP1
hsa-miR-155|SOX10	PIK3R1-ARNT2; TGFBR2-ITGB2; TGFBR2-TCF12; TRIM2-PIK3R1
hsa-miR-181a|ETS1	GRIA2-CAST; KLF6-CAST; NRP1-CAST; PDGFRA-ASPM
hsa-miR-181a|SP1	GRIA2-BAI3; KLF6-IQGAP1; NRP1-FN1; NRP1-IQGAP1
hsa-miR-181b|ETS1	GRIA2-CAST; KLF6-CAST; NRP1-CAST; PDGFRA-ASPM
hsa-miR-181b|SP1	GRIA2-BAI3; KLF6-IQGAP1; NRP1-FN1; NRP1-IQGAP1
hsa-miR-181c|ETS1	GRIA2-CAST; KLF6-CAST; NRP1-CAST; PDGFRA-ASPM
hsa-miR-181c|SP1	GRIA2-BAI3; KLF6-IQGAP1; NRP1-FN1; NRP1-IQGAP1
hsa-miR-340|SMAD4	CAST-BAI3; GRIA2-BAI3; LRP1B-BAI3; LRP1B-GRIA2
hsa-miR-495|ETS1	LRP1B-GRIA2; TNC-CAST; TNFRSF1B-CAST; TNFRSF1B-ITGB2
hsa-miR-495|SP2	NOTCH1-MGMT; PIK3R1-NTRK3; TNC-IQGAP1; TNC-SLC2A1
hsa-miR-7|SP1	TCF12-AURKB; TCF12-BAI3; TCF12-IDH1; TCF12-NOTCH1
hsa-miR-9|ETS1	NRP1-CAST; TGFBR2-CAST; TGFBR2-ITGB2; TNC-CAST
hsa-miR-9|SMAD4	NRP1-COL1A2; TGFBR2-ITGB2; TGFBR2-NRP1; TNC-SLC2A1
hsa-miR-106b|EGR3	NTRK3-ARNT2; PIK3R1-ARNT2; PIK3R1-NTRK3
hsa-miR-124|ETS1	NRP1-CAST; STEAP3-CAST; STEAP3-GRIA2
hsa-miR-124|IRF1	NRP1-CAST; NRP1-FN1; STEAP3-CAST
hsa-miR-124|SMAD4	NRP1-COL1A2; STEAP3-GRIA2; STEAP3-LTF
hsa-miR-130a|MAF	LRP1B-GRIA2; TNFRSF1B-MAN2B1; ZEB1-GRIA2
hsa-miR-130a|ZEB1	LRP1B-GRIA2; ZEB1-GRIA2; ZEB1-PROX1
hsa-miR-144|CEBPA	TGFBR2-A2M; TGFBR2-AXL; TGFBR2-CAST
hsa-miR-148a|POU3F2	KIT-CAST; SLC2A1-CAST; TNFRSF1B-CAST
hsa-miR-148a|SMAD2	CAST-BAI3; TNFRSF1B-ITGB2; TNFRSF1B-MAN2B1
hsa-miR-152|POU3F2	KIT-CAST; SLC2A1-CAST; TNFRSF1B-CAST
hsa-miR-152|SMAD2	CAST-BAI3; TNFRSF1B-ITGB2; TNFRSF1B-MAN2B1
hsa-miR-155|ETS1	LRP1B-GRIA2; TGFBR2-CAST; TGFBR2-ITGB2
hsa-miR-17|EGR3	NTRK3-ARNT2; PIK3R1-ARNT2; PIK3R1-NTRK3
hsa-miR-181a|ERF	GRIA2-CAST; KLF6-CAST; NRP1-CAST
hsa-miR-181a|TEAD1	GRIA2-ANXA1; NRP1-COL1A2; TRIM2-PIK3R1
hsa-miR-181b|ERF	GRIA2-CAST; KLF6-CAST; NRP1-CAST
hsa-miR-181b|TEAD1	GRIA2-ANXA1; NRP1-COL1A2; TRIM2-PIK3R1
hsa-miR-181c|ERF	GRIA2-CAST; KLF6-CAST; NRP1-CAST
hsa-miR-218|SP1	DCX-BAMBI; GRIA2-BAI3; KIT-IQGAP1
hsa-miR-219-5p|SMAD4	TCF12-BAI3; TCF12-GRIA2; TCF12-ITGB2
hsa-miR-23a|TEAD1	MYO5C-MEOX2; ZEB1-GRIA2; ZEB1-TCF12
hsa-miR-23b|TEAD1	MYO5C-MEOX2; ZEB1-GRIA2; ZEB1-TCF12
hsa-miR-29b|SP1	COL1A1-BAI3; DCX-BAMBI; PIK3R1-NTRK3
hsa-miR-29c|SP1	COL1A1-BAI3; DCX-BAMBI; PIK3R1-NTRK3
hsa-miR-340|PITX2	CAST-ANXA1; GRIA2-ANXA1; KIT-ANXA1
hsa-miR-340|ZNF148	GRIA2-CAST; KIT-CAST; SLC2A1-CAST
hsa-miR-34a|SMAD4	TCF12-BAI3; TCF12-GRIA2; TCF12-ITGB2
hsa-miR-34c-5p|SMAD4	TCF12-BAI3; TCF12-GRIA2; TCF12-ITGB2
hsa-miR-519d|EGR3	NTRK3-ARNT2; PIK3R1-ARNT2; PIK3R1-NTRK3
hsa-miR-93|EGR3	NTRK3-ARNT2; PIK3R1-ARNT2; PIK3R1-NTRK3
hsa-miR-93|NR4A2	NTRK3-ARNT2; PIK3R1-ARNT2; SV2B-RTN1
hsa-let-7a|GTF2I	COL1A1-BAI3; NTRK3-BAI3
hsa-let-7c|GTF2I	COL1A1-BAI3; NTRK3-BAI3
hsa-let-7f|GTF2I	COL1A1-BAI3; NTRK3-BAI3
hsa-let-7g|GTF2I	COL1A1-BAI3; NTRK3-BAI3
hsa-let-7i|GTF2I	COL1A1-BAI3; NTRK3-BAI3
hsa-miR-101|STAT6	FN1-A2M; FN1-COL1A1
hsa-miR-103|HMGA1	LRP1B-BAI3; PIK3R1-NTRK3
hsa-miR-106b|HIF1A	NTRK3-BAI3; SV2B-RTN1
hsa-miR-107|HMGA1	LRP1B-BAI3; PIK3R1-NTRK3
hsa-miR-124|CEBPG	NRP1-COL3A1; STEAP3-MEOX2
hsa-miR-124|SP1	NRP1-FN1; NRP1-IQGAP1
hsa-miR-124|SP2	NRP1-FN1; NRP1-IQGAP1
hsa-miR-124|SP3	NRP1-FN1; NRP1-IQGAP1
hsa-miR-124|TCF3	NRP1-COL1A2; NRP1-KIT
hsa-miR-124|TCF4	NRP1-COL1A2; NRP1-KIT
hsa-miR-124|ZNF148	NRP1-CAST; STEAP3-CAST
hsa-miR-128|SMAD2	NTRK3-BAI3; NTRK3-NRP1
hsa-miR-128|SP1	NTRK3-BAI3; PIK3R1-NTRK3
hsa-miR-130a|EGR3	MEOX2-IDH1; NRP1-ARNT2
hsa-miR-130a|TCF4	NRP1-COL1A2; NRP1-KIT
hsa-miR-133a|SP1	COL1A1-BAI3; EGFR-BAMBI
hsa-miR-133b|SP1	COL1A1-BAI3; EGFR-BAMBI
hsa-miR-135a|GATA3	SV2B-RTN1; TGFBR2-CAST
hsa-miR-135a|SMAD4	TGFBR2-ITGB2; TGFBR2-NRP1
hsa-miR-137|TCF4	NRP1-COL1A2; NRP1-KIT
hsa-miR-138|HIF1A	TCF12-AURKB; TCF12-BAI3
hsa-miR-144|STAT6	TGFBR2-A2M; TGFBR2-NRP1
hsa-miR-148a|CEBPG	CAST-ANXA1; KIT-ANXA1
hsa-miR-148a|SP1	CAST-BAI3; KIT-IQGAP1
hsa-miR-148a|ZBTB7A	CAST-BAI3; TNFRSF1B-TGFBR2
hsa-miR-152|CEBPG	CAST-ANXA1; KIT-ANXA1
hsa-miR-152|SP1	CAST-BAI3; KIT-IQGAP1
hsa-miR-155|SP3	PIK3R1-NTRK3; TGFBR2-IQGAP1
hsa-miR-15b|SMAD3	LRP1B-BAI3; LRP1B-GRIA2
hsa-miR-15b|TEAD1	LRP1B-GRIA2; TRIM2-PIK3R1
hsa-miR-17|HIF1A	NTRK3-BAI3; SV2B-RTN1
hsa-miR-17|ZBTB7A	NTRK3-BAI3; PIK3R1-NTRK3
hsa-miR-181a|SMAD2	GRIA2-BAI3; NRP1-COL1A2
hsa-miR-181b|SMAD2	GRIA2-BAI3; NRP1-COL1A2
hsa-miR-195|SMAD3	LRP1B-BAI3; LRP1B-GRIA2
hsa-miR-196a|HMGA1	COL1A1-BAI3; PDGFRA-DCX
hsa-miR-196b|HMGA1	COL1A1-BAI3; PDGFRA-DCX
hsa-miR-204|SP1	DCX-BAMBI; TRMT5-AURKB
hsa-miR-204|TFAP2A	DCX-BAMBI; TRIM2-PIK3R1
hsa-miR-21|EGR3	PIK3R1-ARNT2; PIK3R1-NTRK3
hsa-miR-221|TFAP2A	DCX-BAMBI; KPNA2-ASPM
hsa-miR-222|TFAP2A	DCX-BAMBI; KPNA2-ASPM
hsa-miR-23a|ZEB1	ZEB1-GRIA2; ZEB1-PROX1
hsa-miR-23b|ZEB1	ZEB1-GRIA2; ZEB1-PROX1
hsa-miR-25|SP1	DCX-BAMBI; NOTCH1-MGMT
hsa-miR-25|TFAP2A	DCX-BAMBI; NOTCH1-ARNT2
hsa-miR-27a|ATF3	PDGFRA-ASPM; TRIM2-PIK3R1
hsa-miR-27b|ATF3	PDGFRA-ASPM; TRIM2-PIK3R1
hsa-miR-29b|ETV4	COL1A1-BAI3; COL1A2-COL1A1
hsa-miR-29c|ETV4	COL1A1-BAI3; COL1A2-COL1A1
hsa-miR-30b|SP4	DCX-BAMBI; NOTCH1-MGMT
hsa-miR-30c|SP4	DCX-BAMBI; NOTCH1-MGMT
hsa-miR-30d|SP4	DCX-BAMBI; NOTCH1-MGMT
hsa-miR-30e|SP4	DCX-BAMBI; NOTCH1-MGMT
hsa-miR-340|TCF3	NOTCH1-CTSH; TRMT5-AURKB
hsa-miR-370|ERF	TGFBR2-CAST; TGFBR2-ITGB2
hsa-miR-495|ZNF148	TNC-CAST; TNFRSF1B-CAST
hsa-miR-519d|HIF1A	NTRK3-BAI3; SV2B-RTN1
hsa-miR-519d|ZBTB7A	NTRK3-BAI3; PIK3R1-NTRK3
hsa-miR-92b|SP1	DCX-BAMBI; NOTCH1-MGMT
hsa-miR-92b|TFAP2A	DCX-BAMBI; NOTCH1-ARNT2
hsa-miR-93|HIF1A	NTRK3-BAI3; SV2B-RTN1
hsa-miR-98|GTF2I	COL1A1-BAI3; NTRK3-BAI3
hsa-let-7a|EGR3	NTRK3-ARNT2
hsa-let-7a|ELF4	TNFRSF1B-ITGB2
hsa-let-7c|EGR3	NTRK3-ARNT2
hsa-let-7c|ELF4	TNFRSF1B-ITGB2
hsa-let-7e|EGR3	NTRK3-ARNT2
hsa-let-7e|ELF4	TNFRSF1B-ITGB2
hsa-let-7f|EGR3	NTRK3-ARNT2
hsa-let-7f|ELF4	TNFRSF1B-ITGB2
hsa-let-7g|EGR3	NTRK3-ARNT2
hsa-let-7g|ELF4	TNFRSF1B-ITGB2
hsa-let-7i|EGR3	NTRK3-ARNT2
hsa-let-7i|ELF4	TNFRSF1B-ITGB2
hsa-miR-101|EGR3	PIK3C2B-NTRK3
hsa-miR-101|ETS1	PIK3C2B-GRIA2
hsa-miR-101|TGIF1	PIK3C2B-BAI3
hsa-miR-106b|IRF1	NTRK3-BAI3
hsa-miR-106b|STAT3	NTRK3-NRP1
hsa-miR-124|EGR2	NRP1-ARNT2
hsa-miR-124|NR3C1	NRP1-COL1A1
hsa-miR-124|STAT3	NRP1-COL1A1
hsa-miR-124|TFAP4	STEAP3-MEOX2
hsa-miR-128|FOXO1	PDGFRA-ASPM
hsa-miR-128|FOXO4	PDGFRA-ASPM
hsa-miR-128|GATA2	PDGFRA-DCX
hsa-miR-128|SP2	PIK3R1-NTRK3
hsa-miR-128|SP4	PIK3R1-NTRK3
hsa-miR-128|TEAD1	NTRK3-NRP1
hsa-miR-129-5p|ARNT	DCX-BAMBI
hsa-miR-132|GATA2	SLC2A1-CAST
hsa-miR-135a|ATF3	SV2B-RTN1
hsa-miR-135a|SP1	TGFBR2-IQGAP1
hsa-miR-135a|SP3	TGFBR2-IQGAP1
hsa-miR-137|MAX	NRP1-KIT
hsa-miR-137|NFYB	NRP1-COL1A1
hsa-miR-137|NFYC	NRP1-COL1A1
hsa-miR-137|TEAD1	NRP1-COL1A2
hsa-miR-137|ZBTB7A	NRP1-KIT
hsa-miR-137|ZNF148	NRP1-CAST
hsa-miR-138|TCF4	TCF12-AURKB
hsa-miR-139-5p|FOXO1	TCF12-ASPM
hsa-miR-139-5p|MAF	TCF12-GRIA2
hsa-miR-139-5p|TCF4	TCF12-AURKB
hsa-miR-143|NFIC	PDGFRA-GNAI1
hsa-miR-143|SMAD3	COL1A1-BAI3
hsa-miR-144|SP4	TGFBR2-IQGAP1
hsa-miR-144|ZNF148	TGFBR2-CAST
hsa-miR-148a|FOSB	TNFRSF1B-TGFBR2
hsa-miR-148a|MAF	TNFRSF1B-MAN2B1
hsa-miR-150|SP1	PIK3R1-NTRK3
hsa-miR-152|MAF	TNFRSF1B-MAN2B1
hsa-miR-154|NRF1	TCF12-GRIA2
hsa-miR-155|TCF4	TGFBR2-AXL
hsa-miR-15b|FOXO1	PHIP-ASPM
hsa-miR-15b|HMGA1	LRP1B-BAI3
hsa-miR-15b|PURA	LRP1B-GRIA2
hsa-miR-15b|TCF3	TRIM2-PIK3R1
hsa-miR-16|FOXO1	PHIP-ASPM
hsa-miR-16|TCF3	TRIM2-PIK3R1
hsa-miR-16|TEAD1	TRIM2-PIK3R1
hsa-miR-17|IRF1	NTRK3-BAI3
hsa-miR-17|STAT3	NTRK3-NRP1
hsa-miR-181a|EGR3	NRP1-ARNT2
hsa-miR-181a|FOS	NRP1-FN1
hsa-miR-181a|YY1	NRP1-ARNT2
hsa-miR-181b|EGR3	NRP1-ARNT2
hsa-miR-181b|FOS	NRP1-FN1
hsa-miR-181b|YY1	NRP1-ARNT2
hsa-miR-181c|EGR3	NRP1-ARNT2
hsa-miR-181c|FOS	NRP1-FN1
hsa-miR-181c|YY1	NRP1-ARNT2
hsa-miR-182|FOXO1	PDGFRA-ASPM
hsa-miR-182|FOXO3	PDGFRA-ASPM
hsa-miR-183|TEAD1	TRIM2-PIK3R1
hsa-miR-195|FOXO1	PHIP-ASPM
hsa-miR-195|HMGA1	LRP1B-BAI3
hsa-miR-195|PURA	LRP1B-GRIA2
hsa-miR-195|TCF3	TRIM2-PIK3R1
hsa-miR-199b-5p|SP1	KIT-IQGAP1
hsa-miR-199b-5p|ZNF148	KIT-CAST
hsa-miR-203|SMAD3	DCX-BAMBI
hsa-miR-219-5p|GATA2	TCF12-STEAP3
hsa-miR-221|ETS1	KPNA2-ASPM
hsa-miR-221|FOXO3	KPNA2-ASPM
hsa-miR-221|SOX10	KPNA2-CHEK1
hsa-miR-222|ETS1	KPNA2-ASPM
hsa-miR-222|FOXO3	KPNA2-ASPM
hsa-miR-23a|CEBPA	MYO5C-MEOX2
hsa-miR-23a|EGR3	MYO5C-ARNT2
hsa-miR-23a|IRF1	ZEB1-BAI3
hsa-miR-23a|RUNX2	MYO5C-MEOX2
hsa-miR-23a|TGIF1	ZEB1-BAI3
hsa-miR-23b|CEBPA	MYO5C-MEOX2
hsa-miR-23b|EGR3	MYO5C-ARNT2
hsa-miR-23b|IRF1	ZEB1-BAI3
hsa-miR-23b|RUNX2	MYO5C-MEOX2
hsa-miR-23b|TGIF1	ZEB1-BAI3
hsa-miR-24|TCF7	PDGFRA-DCX
hsa-miR-26a|LEF1	PDGFRA-DCX
hsa-miR-26a|SMAD1	PDGFRA-DCX
hsa-miR-26a|TFAP2A	PDGFRA-ASPM
hsa-miR-26b|LEF1	PDGFRA-DCX
hsa-miR-26b|SMAD1	PDGFRA-DCX
hsa-miR-27a|FOXO1	PDGFRA-ASPM
hsa-miR-27a|SP1	DCX-BAMBI
hsa-miR-27a|TEAD1	TRIM2-PIK3R1
hsa-miR-27b|FOXO1	PDGFRA-ASPM
hsa-miR-27b|SP1	DCX-BAMBI
hsa-miR-27b|TEAD1	TRIM2-PIK3R1
hsa-miR-29b|ARNT	DCX-BAMBI
hsa-miR-29b|YY1	PIK3R1-ARNT2
hsa-miR-29c|ARNT	DCX-BAMBI
hsa-miR-29c|YY1	PIK3R1-ARNT2
hsa-miR-30b|ZBTB7A	DCX-BAMBI
hsa-miR-30c|ZBTB7A	DCX-BAMBI
hsa-miR-340|AHR	TRMT5-AURKB
hsa-miR-340|EGR3	NOTCH1-ARNT2
hsa-miR-340|MAF	LRP1B-GRIA2
hsa-miR-340|NFKB1	GRIA2-DCX
hsa-miR-340|NR3C1	GRIA2-DCX
hsa-miR-340|NR4A2	NOTCH1-ARNT2
hsa-miR-340|SREBF1	NOTCH1-MGMT
hsa-miR-340|TCF4	TRMT5-AURKB
hsa-miR-340|YY1	NOTCH1-ARNT2
hsa-miR-34a|NR4A2	TCF12-ITGB2
hsa-miR-34a|YY1	TCF12-STEAP3
hsa-miR-34c-5p|NR4A2	TCF12-ITGB2
hsa-miR-34c-5p|YY1	TCF12-STEAP3
hsa-miR-361-5p|SP1	PIK3R1-NTRK3
hsa-miR-370|FOXO3	GYPC-ENPP2
hsa-miR-370|ZNF148	TGFBR2-CAST
hsa-miR-376a|SP1	PIK3R1-NTRK3
hsa-miR-376a|ZBTB7A	PIK3R1-NTRK3
hsa-miR-425|SMAD2	TNC-SLC2A1
hsa-miR-455-5p|ETS1	PDGFRA-ASPM
hsa-miR-486-5p|SMAD2	GRIA2-BAI3
hsa-miR-503|PURA	PIK3R1-ARNT2
hsa-miR-519d|IRF1	NTRK3-BAI3
hsa-miR-519d|STAT3	NTRK3-NRP1
hsa-miR-7|EGR3	TCF12-IDH1
hsa-miR-7|TCF4	TCF12-AURKB
hsa-miR-93|IRF1	NTRK3-BAI3
hsa-miR-93|STAT3	NTRK3-NRP1
hsa-miR-98|EGR3	NTRK3-ARNT2
hsa-miR-98|ELF4	TNFRSF1B-ITGB2
hsa-miR-9|EGR3	NRP1-ARNT2

## Sheet: Composite-FFLs
Merged 4-node FFLs: composite-FFLs
FFL ID	GBM-related gene-gene pairs
hsa-miR-9|TCF7	COL4A2-COL3A1; NRP1-COL1A2; NRP1-COL3A1; NRP1-FN1; TGFBR2-A2M; TGFBR2-NRP1; TGFBR2-TCF12; TNC-ANXA1
hsa-let-7e|SMAD2	COL1A1-BAI3; NTRK3-BAI3; NTRK3-NRP1; STEAP3-GRIA2; STEAP3-LTF; TNFRSF1B-ITGB2; TNFRSF1B-MAN2B1
hsa-miR-9|PURA	NRP1-ARNT2; NRP1-COL1A1; NRP1-COL1A2; NRP1-KIT; TGFBR2-AXL; TGFBR2-NRP1
hsa-miR-152|TEAD1	CAST-ANXA1; KIT-ANXA1; TNFRSF1B-A2M; TNFRSF1B-MAN2B1; TNFRSF1B-TCF12
hsa-miR-495|TEAD1	LRP1B-GRIA2; TNC-ANXA1; TNFRSF1B-A2M; TNFRSF1B-MAN2B1; TNFRSF1B-TCF12
hsa-miR-138|TEAD1	TCF12-AURKB; TCF12-GRIA2; TCF12-IDH1; TCF12-MEOX2
hsa-miR-137|SP1	NOTCH1-MGMT; NRP1-FN1; NRP1-IQGAP1
hsa-miR-181c|TEAD1	GRIA2-ANXA1; NRP1-COL1A2; TRIM2-PIK3R1
hsa-miR-218|TEAD1	GRIA2-ANXA1; KIT-ANXA1; SV2B-RTN1
hsa-let-7e|GTF2I	COL1A1-BAI3; NTRK3-BAI3
hsa-miR-106b|ZBTB7A	NTRK3-BAI3; PIK3R1-NTRK3
hsa-miR-144|SMAD4	TGFBR2-ITGB2; TGFBR2-NRP1
hsa-miR-152|ZBTB7A	CAST-BAI3; TNFRSF1B-TGFBR2
hsa-miR-181c|SMAD2	GRIA2-BAI3; NRP1-COL1A2
hsa-miR-182|TEAD1	FN1-A2M; FN1-COL1A2
hsa-miR-195|TEAD1	LRP1B-GRIA2; TRIM2-PIK3R1
hsa-miR-93|ZBTB7A	NTRK3-BAI3; PIK3R1-NTRK3
hsa-miR-152|FOSB	TNFRSF1B-TGFBR2
hsa-miR-154|MAF	TCF12-GRIA2
hsa-miR-203|SP1	DCX-BAMBI
hsa-miR-203|SP4	DCX-BAMBI
hsa-miR-218|NFE2L1	SV2B-RTN1
hsa-miR-222|SOX10	KPNA2-CHEK1
hsa-miR-26b|TFAP2A	PDGFRA-ASPM
